# Supplementary material
Source: PubMed Central journal article supplement (PMC4514443)
Supplement: NIHMS664196-supplement-Supp_TableS1-S2.pdf [file NIHMS664196-supplement-Supp_TableS1-S2.pdf]

**Proteomic profiling of patient-derived glioblastoma xenografts identifies a subset with activated EGFR: Implications for personalized drug development**

Kristine E. Brown, Gustavo Chagoya, Shawn G. Kwatra, Timothy Yen, Stephen T. Keir, Mary Cooter, Katherine A. Hoadley, Ahmed Rasheed, Eric S. Lipp, Roger McLendon, Francis Ali-Osman, Darell D. Bigner, John H. Sampson, Madan M. Kwatra\*

**\*Corresponding Author:**

Madan M. Kwatra, PhD,

Department of Anesthesiology,

Duke University Medical Center,

Durham, NC 27710.

Phone: 919-681-4782

Fax: 919-681-8089

E-mail: [kwatr001@mc.duke.edu](mailto:kwatr001@mc.duke.edu)

Table S1. RPPA Protein expression data of 20 PDGX

Brown et al.

| Sample Source | Sample ID | TCGA Subtype | 14-3-3_beta-R-V | 14-3-3_zeta-R-V | 4E-BP1-R-V  |
|---------------|-----------|--------------|-----------------|-----------------|-------------|
| Xenograft     | 08-0308   | Classical    | 0.648126729     | 2.925190815     | 0.551927027 |
| Xenograft     | 08-0500   | Classical    | 0.562788224     | 3.10277634      | 0.640302946 |
| Xenograft     | 08-0549   | Classical    | 0.639044902     | 3.469100797     | 0.390563509 |
| Xenograft     | 09-0155   | Classical    | 0.676700711     | 4.614051748     | 0.500486896 |
| Xenograft     | 09-0211   | Classical    | 0.58607535      | 2.86364797      | 0.561247172 |
| Xenograft     | 09-0394   | Classical    | 0.547883253     | 3.199386974     | 0.592782082 |
| Xenograft     | 09-0584   | Classical    | 0.555441638     | 2.825814007     | 0.437552916 |
| Xenograft     | 10-0171   | Classical    | 0.56862968      | 2.202164205     | 0.458068877 |
| Xenograft     | 08-0430   | Mesenchymal  | 0.55642681      | 2.478197168     | 1.052163131 |
| Xenograft     | 08-0679   | Mesenchymal  | 0.644304025     | 2.870952015     | 0.640926344 |
| Xenograft     | 09-0337   | Mesenchymal  | 0.61667714      | 3.948346315     | 0.42828662  |
| Xenograft     | 09-0362   | Mesenchymal  | 0.960556996     | 1.28408814      | 0.651620885 |
| Xenograft     | 09-0477   | Mesenchymal  | 0.637472654     | 6.015892287     | 0.713004416 |
| Xenograft     | 09-0500   | Mesenchymal  | 0.620155692     | 3.704319634     | 0.715579803 |
| Xenograft     | 09-0627   | Mesenchymal  | 0.709251244     | 2.600264072     | 0.568008131 |
| Xenograft     | 11-0040   | Mesenchymal  | 0.733962541     | 2.1912973       | 0.836946795 |
| Xenograft     | 08-0478   | Proneural    | 0.780279862     | 1.888910249     | 0.565097867 |
| Xenograft     | 08-0499   | Proneural    | 0.592011258     | 3.091373001     | 0.891882283 |
| Xenograft     | 08-0624   | Proneural    | 0.670838589     | 2.991234624     | 0.875154231 |
| Xenograft     | 10-0021   | Proneural    | 0.534887393     | 3.109579612     | 0.448090698 |

Table S1. RPPA Protein expression data of 20 PDGX

Brown et al.

| 4E-BP1_pS65-R-V | 4E-BP1_pT37_T46-R-V | 53BP1-R-E   | ACC_pS79-R-V |
|-----------------|---------------------|-------------|--------------|
| 0.743067759     | 1.557073361         | 0.675907855 | 2.492662991  |
| 0.890295989     | 2.239397087         | 0.922186877 | 2.38521641   |
| 0.849085947     | 2.343679115         | 0.988990293 | 1.426914335  |
| 0.779419282     | 2.801757783         | 1.455014518 | 1.322061877  |
| 0.832583978     | 1.600264631         | 0.636309392 | 0.804923225  |
| 1.196945465     | 1.725705359         | 0.572768058 | 2.986311386  |
| 0.733107741     | 1.796301311         | 0.908916315 | 1.248387615  |
| 0.822518545     | 1.635260882         | 1.165683274 | 2.253547426  |
| 1.171232867     | 2.941009123         | 0.822182583 | 3.606980475  |
| 0.892765781     | 2.262392407         | 1.03225308  | 1.669938468  |
| 0.924918359     | 1.672792931         | 0.499973247 | 0.724792313  |
| 0.635700452     | 0.864293692         | 0.451270851 | 7.674826669  |
| 1.062884424     | 2.098325514         | 0.506087539 | 1.69396849   |
| 1.026541728     | 2.340583683         | 0.686151731 | 2.092685964  |
| 0.861720999     | 1.712527366         | 0.808973432 | 0.75343355   |
| 0.653275511     | 1.812060432         | 0.1540807   | 1.216820804  |
| 0.636872735     | 1.792824499         | 0.333157357 | 5.149504809  |
| 1.021693125     | 2.749515215         | 0.343370823 | 2.126423247  |
| 0.709141637     | 1.388183443         | 0.254602604 | 0.899402586  |
| 0.783867107     | 1.845027179         | 1.025835126 | 1.344624752  |

Table S1. RPPA Protein expression data of 20 PDGX

Brown et al.

| ACC1-R-E    | ACVRL1-R-C  | Akt-R-V     | Akt_pS473-R-V | Akt_pT308-R-V |
|-------------|-------------|-------------|---------------|---------------|
| 4.268731905 | 0.306774176 | 14.22871739 | 1.147097512   | 0.496612406   |
| 3.884742265 | 0.313047183 | 12.79182654 | 6.465276593   | 2.861573979   |
| 2.150786285 | 0.265453016 | 14.10841509 | 1.038952375   | 0.348724678   |
| 1.470167947 | 0.297596988 | 12.99222301 | 4.708419573   | 1.717565641   |
| 1.164845135 | 0.270476353 | 22.45103075 | 3.93681692    | 1.924396756   |
| 4.576534238 | 0.246097919 | 14.88530068 | 9.172363461   | 3.186919199   |
| 1.64899579  | 0.332096853 | 14.91487968 | 4.114799208   | 1.332604626   |
| 3.677385242 | 0.331587325 | 14.30525523 | 3.701122357   | 1.079096843   |
| 6.1741912   | 0.315433097 | 14.06051289 | 2.93427934    | 0.896009893   |
| 3.382884645 | 0.358638314 | 15.8117987  | 3.051582997   | 0.797567875   |
| 1.414133568 | 0.278672412 | 20.36451637 | 4.306128552   | 2.012405123   |
| 17.37382984 | 0.67601306  | 3.920487586 | 0.612556631   | 0.394204467   |
| 3.149320963 | 0.302538963 | 4.487459207 | 4.744632043   | 1.717200448   |
| 3.886794689 | 0.300652215 | 14.79792228 | 0.596117277   | 0.357832208   |
| 1.283626443 | 0.298906934 | 10.29041677 | 1.48238209    | 0.559153507   |
| 1.535588179 | 0.382799269 | 16.01683625 | 1.302869936   | 0.602843726   |
| 9.423777915 | 0.447601351 | 8.689973493 | 1.567980129   | 0.654144547   |
| 4.136242855 | 0.571508412 | 11.0122114  | 3.10623513    | 0.813984647   |
| 1.645863269 | 0.31339174  | 6.062929327 | 2.960568884   | 1.181474296   |
| 1.887232542 | 0.33081396  | 21.52545212 | 4.85355379    | 1.59358508    |

Table S1. RPPA Protein expression data of 20 PDGX

Brown et al.

| AMPK_alpha-R-C | AMPK_pT172-R-V | Annexin_I-R-E | AR-R-V      | Bad_pS112-R-V |
|----------------|----------------|---------------|-------------|---------------|
| 0.801945515    | 3.211867874    | 1.135245825   | 0.433709733 | 0.657042944   |
| 0.794641412    | 3.581880049    | 1.436183598   | 0.275725792 | 0.542081621   |
| 0.616436669    | 2.285452077    | 8.172143717   | 0.228596417 | 0.787577692   |
| 0.682932044    | 2.277534251    | 3.334518417   | 0.329503204 | 0.550101411   |
| 0.74817316     | 2.017794823    | 4.101013518   | 0.270159406 | 0.676305881   |
| 0.65549474     | 1.889020702    | 0.951969818   | 0.296809909 | 0.555370677   |
| 0.737469941    | 2.482799049    | 2.519231788   | 0.270382077 | 0.627836333   |
| 0.776470145    | 2.23470167     | 2.832678438   | 0.240584254 | 0.558389081   |
| 0.604209553    | 1.509670213    | 4.05596061    | 0.192531663 | 0.6259235     |
| 0.699574091    | 2.289795072    | 4.882447244   | 0.303494112 | 0.568176487   |
| 0.993133371    | 2.035755007    | 3.44550602    | 0.231142299 | 0.577321071   |
| 0.846074062    | 2.642916652    | 0.586906418   | 0.396519169 | 0.563596938   |
| 0.990779392    | 2.842398064    | 9.540018079   | 0.28513108  | 0.553530841   |
| 0.84036774     | 1.877679972    | 8.668624559   | 0.238016999 | 0.641615595   |
| 0.75146213     | 1.453355183    | 3.742777545   | 0.417655708 | 0.566936103   |
| 0.841121633    | 2.574450052    | 3.151991817   | 0.404478245 | 0.768277036   |
| 0.91861472     | 1.539947862    | 1.143163431   | 0.344634249 | 0.480555773   |
| 0.745525477    | 1.934319955    | 0.209506736   | 0.228073958 | 0.606882026   |
| 0.564149966    | 1.023664085    | 1.177407439   | 0.311546604 | 0.471870631   |
| 0.738885606    | 3.074063145    | 2.458575317   | 0.269121557 | 0.687751753   |

Table S1. RPPA Protein expression data of 20 PDGX

Brown et al.

| Bak-R-E     | Bax-R-V     | Bcl-xL-R-V  | Beclin-G-C  | beta-Catenin-R-V |
|-------------|-------------|-------------|-------------|------------------|
| 0.555202875 | 0.679787837 | 0.559227279 | 0.270441023 | 2.099792912      |
| 0.498371987 | 0.490795265 | 0.37428546  | 0.221396741 | 2.009325505      |
| 0.540265679 | 0.664484882 | 0.497761423 | 0.218461429 | 4.016554086      |
| 0.504784367 | 0.793209412 | 0.658474825 | 0.202421846 | 3.018104727      |
| 0.584777826 | 0.656151286 | 0.611018057 | 0.208139152 | 3.763217584      |
| 0.582814046 | 0.606678165 | 0.512693369 | 0.182160456 | 2.357599249      |
| 0.587055986 | 0.686094798 | 0.46549419  | 0.20972338  | 2.67929393       |
| 0.599847278 | 0.616600175 | 0.558534438 | 0.209186826 | 3.463562722      |
| 0.749577081 | 0.578928644 | 0.422138429 | 0.178290372 | 2.859272907      |
| 0.565161476 | 0.500591608 | 0.520953875 | 0.227749448 | 1.644503456      |
| 0.556256652 | 0.824996971 | 0.529567328 | 0.204772454 | 3.303746507      |
| 0.521094385 | 0.464044467 | 0.661594225 | 0.654549193 | 0.720238636      |
| 0.604330311 | 0.55914657  | 0.672890929 | 0.219483537 | 1.517513973      |
| 0.530053348 | 0.49766494  | 0.478210088 | 0.235698385 | 2.101733638      |
| 0.59570851  | 0.629016538 | 0.694821862 | 0.25933917  | 1.630299189      |
| 0.67020816  | 0.625197686 | 0.765131741 | 0.230150541 | 1.894967994      |
| 0.632190874 | 0.531480561 | 0.617650945 | 0.357698801 | 1.577733675      |
| 0.898461462 | 0.731373054 | 0.558048886 | 0.212627074 | 2.801964783      |
| 0.595692639 | 0.779626146 | 0.57130172  | 0.233027068 | 1.133552233      |
| 0.571962667 | 0.667913035 | 0.423363687 | 0.200801441 | 2.876213605      |

Table S1. RPPA Protein expression data of 20 PDGX

Brown et al.

| Bid-R-C     | Bim-R-V     | c-Kit-R-V   | c-Met_pY1235-R-V | c-Myc-R-C   |
|-------------|-------------|-------------|------------------|-------------|
| 0.68617966  | 0.57428195  | 0.146509808 | 0.491809878      | 10.73155809 |
| 0.57269376  | 0.403154384 | 0.132948702 | 0.486108816      | 7.669879721 |
| 0.718462522 | 0.36553324  | 0.132763361 | 0.510241188      | 10.30599204 |
| 0.696586208 | 0.352461599 | 0.133512397 | 0.470124852      | 10.58964189 |
| 0.706370586 | 0.399437877 | 0.146799103 | 0.494955904      | 9.800615886 |
| 0.727549558 | 0.274570044 | 0.130465587 | 1.330494402      | 8.008935593 |
| 0.660377079 | 0.384167851 | 0.148537433 | 0.480567439      | 9.010972998 |
| 0.856616524 | 0.345215928 | 0.138737188 | 0.544421001      | 7.756876036 |
| 0.792730285 | 0.343825192 | 0.139449151 | 0.535189804      | 19.68410181 |
| 0.621106746 | 0.400216656 | 0.147266403 | 0.526541607      | 8.659951154 |
| 0.732367122 | 0.361972763 | 0.20076403  | 0.456053038      | 6.370732455 |
| 0.549974257 | 0.520516478 | 0.269715179 | 0.515496367      | 18.38853398 |
| 0.781606705 | 0.281128545 | 0.155266229 | 0.908847779      | 10.25978332 |
| 0.577419129 | 0.323000642 | 0.146345778 | 0.492737031      | 10.1055906  |
| 0.7134871   | 0.405590967 | 0.179751813 | 0.532538236      | 8.821103702 |
| 0.985526965 | 0.406896805 | 0.174988818 | 0.59192223       | 9.302878666 |
| 1.094358414 | 0.496732707 | 0.190543532 | 0.630771226      | 12.18617033 |
| 0.775470165 | 0.657828283 | 0.890096766 | 0.548582597      | 11.5559514  |
| 0.931791075 | 0.412906667 | 0.157077035 | 0.614480183      | 15.7671607  |
| 0.634745104 | 0.366582859 | 0.142719301 | 0.48525512       | 9.014044023 |

Table S1. RPPA Protein expression data of 20 PDGX

Brown et al.

| C-Raf-R-V   | C-Raf_pS338-R-E | Caspase-7_cleavedD198-R-C |
|-------------|-----------------|---------------------------|
| 0.872755875 | 0.724592737     | 0.231491181               |
| 0.807509584 | 0.610629078     | 0.142999346               |
| 0.776186626 | 0.555498925     | 0.176353142               |
| 0.679104002 | 0.702774609     | 0.219158782               |
| 0.8244627   | 0.547885605     | 0.208383517               |
| 0.907964499 | 0.678821651     | 0.201544882               |
| 0.818687821 | 0.652555853     | 0.184697527               |
| 0.894787745 | 0.69205663      | 0.176911466               |
| 0.933940537 | 0.721349799     | 0.341058041               |
| 0.911018583 | 0.834647678     | 0.147992188               |
| 1.058320852 | 0.586769541     | 0.183399929               |
| 0.608670889 | 0.567169788     | 0.462649631               |
| 0.632928899 | 0.647677063     | 0.241757894               |
| 0.607360977 | 0.494213146     | 0.17603122                |
| 0.730250386 | 0.685154979     | 0.177166446               |
| 0.756996284 | 0.668585702     | 0.202861616               |
| 0.640517151 | 0.620972511     | 0.227098583               |
| 0.812855175 | 0.538746406     | 0.18200049                |
| 0.608278372 | 0.625541416     | 0.297833918               |
| 0.908988806 | 0.694103939     | 0.152903683               |



| Caspase-9_cleavedD330-R-E | Caveolin-1-R-V | CDK1-R-V    | Chk1-R-E    |
|---------------------------|----------------|-------------|-------------|
| 0.376289412               | 1.150134084    | 1.110952527 | 0.561738814 |
| 0.469507257               | 0.536993891    | 1.024098149 | 0.469516973 |
| 0.478542953               | 0.556278454    | 1.017515626 | 0.508600115 |
| 0.58886431                | 0.748536752    | 1.322194013 | 0.623076531 |
| 0.472262297               | 4.859854597    | 1.025700409 | 0.508772976 |
| 0.525511174               | 1.430099852    | 1.402004304 | 0.551583069 |
| 0.48300641                | 0.925099386    | 1.227655867 | 0.534636274 |
| 0.508440402               | 0.597281549    | 0.97654394  | 0.569209997 |
| 0.497335297               | 3.772388173    | 1.591906865 | 0.562592058 |
| 0.41581161                | 0.975471676    | 1.103773646 | 0.610268778 |
| 0.369246265               | 3.772159288    | 1.082252572 | 0.490656959 |
| 0.782591889               | 2.135942588    | 0.79741199  | 0.610605773 |
| 0.450075725               | 13.75184346    | 1.299274094 | 0.526785007 |
| 0.409820009               | 14.92343517    | 1.19299494  | 0.567006718 |
| 0.378506365               | 3.414134771    | 1.06969099  | 0.604310068 |
| 0.443574047               | 0.741439191    | 0.871087587 | 0.540430213 |
| 0.504208617               | 3.66657526     | 0.853027952 | 0.576949608 |
| 0.615492698               | 0.48158526     | 1.789229439 | 0.621559564 |
| 0.446401376               | 0.935248362    | 1.313713286 | 0.657378841 |
| 0.531647024               | 0.677948143    | 1.387335419 | 0.556624688 |

Table S1. RPPA Protein expression data of 20 PDGX

Brown et al.

| Chk1_pS345-R-E | Chk2_pT68-R-E | cIAP-R-E    | Claudin-7-R-V | Collagen_VI-R-V |
|----------------|---------------|-------------|---------------|-----------------|
| 0.316813512    | 0.256129458   | 1.158603681 | 0.408035735   | 1.333795697     |
| 0.308285011    | 0.221410604   | 1.077174069 | 0.303862331   | 1.008894248     |
| 0.465732209    | 0.286635981   | 1.534988828 | 0.288155214   | 1.386201871     |
| 0.326717251    | 0.222086248   | 0.994847106 | 0.289970654   | 1.282430162     |
| 0.27960857     | 0.210639531   | 1.271591095 | 0.336090963   | 1.307645872     |
| 0.380858057    | 0.290362672   | 1.359809176 | 0.313077588   | 1.143797843     |
| 0.345456551    | 0.344198251   | 1.269678984 | 0.324705669   | 1.242251875     |
| 0.730618937    | 0.710160304   | 1.087837512 | 0.328441202   | 1.049260976     |
| 0.455946864    | 0.551547721   | 1.583800295 | 0.303967359   | 1.204806082     |
| 0.275408003    | 0.214202913   | 1.519575849 | 0.336858935   | 1.138107577     |
| 0.314478066    | 0.255796214   | 1.030389942 | 0.324798532   | 1.089129746     |
| 0.40069778     | 0.560643363   | 0.73099496  | 0.501338292   | 1.091221793     |
| 0.320359864    | 0.37930387    | 1.415124879 | 0.326444      | 1.417538289     |
| 0.274031715    | 0.239400979   | 1.823839602 | 0.316837216   | 1.492711084     |
| 0.305691147    | 0.231564815   | 1.610669039 | 0.369855481   | 1.668343535     |
| 0.352253715    | 0.435361432   | 1.207090357 | 0.555444442   | 1.813292585     |
| 0.301840348    | 0.325693128   | 1.039867618 | 0.58703001    | 1.990535406     |
| 0.514768259    | 0.452451448   | 1.243602667 | 0.330649528   | 1.104675952     |
| 0.331188668    | 0.318454202   | 1.307023316 | 0.490803342   | 2.025855138     |
| 0.340231421    | 0.258473511   | 1.432523468 | 0.306017938   | 1.381615041     |

Table S1. RPPA Protein expression data of 20 PDGX

Brown et al.

| Cox2-R-E    | Cyclin_B1-R-V | Cyclin_D1-R-V | DJ-1-R-E    | Dvl3-R-V    |
|-------------|---------------|---------------|-------------|-------------|
| 1.04163809  | 0.890236794   | 0.540071589   | 0.622005234 | 0.525511652 |
| 1.106943271 | 1.022977474   | 0.443865102   | 1.732861187 | 0.530375477 |
| 1.927790263 | 0.434940447   | 0.554103466   | 1.668095187 | 0.308293089 |
| 0.983236979 | 1.020176755   | 0.547604595   | 1.234891224 | 0.448536867 |
| 2.580557016 | 0.797707246   | 0.616651688   | 0.981868517 | 0.441183265 |
| 2.380113896 | 1.516375107   | 0.703510511   | 1.002691602 | 0.501143009 |
| 1.71800511  | 0.89952628    | 0.663927714   | 0.971123553 | 0.38660407  |
| 1.460132431 | 0.711678084   | 0.707714792   | 1.389563301 | 0.459592398 |
| 1.799667855 | 1.20779873    | 0.85761007    | 1.318999381 | 0.649386204 |
| 0.961285716 | 0.88470772    | 0.500339746   | 1.668999106 | 0.640028119 |
| 1.46305367  | 0.970326003   | 0.741508423   | 0.872930068 | 0.580333516 |
| 0.775899497 | 0.432005296   | 0.700065024   | 0.841586621 | 0.773371396 |
| 4.073537963 | 1.853447309   | 0.743267801   | 1.151894107 | 0.403302725 |
| 1.755162047 | 0.955436804   | 0.495720436   | 1.320507722 | 0.420361019 |
| 1.524809385 | 0.817899882   | 0.702744384   | 0.916909351 | 0.506920781 |
| 1.808059915 | 0.482222234   | 0.898545848   | 1.426473737 | 0.437033813 |
| 0.924318604 | 0.320428411   | 0.630225996   | 1.446762185 | 0.529778519 |
| 1.464295618 | 1.315047058   | 0.885266962   | 1.435567022 | 0.420199217 |
| 1.719793439 | 1.038840247   | 0.769959034   | 1.221185727 | 0.442490133 |
| 1.466450301 | 1.081626195   | 0.595183252   | 1.029884862 | 0.436324186 |

Table S1. RPPA Protein expression data of 20 PDGX

Brown et al.

| E-Cadherin-R-V | eEF2-R-C    | eEF2K-R-V   | EGFR-R-V    | EGFR_pY1068-R-C |
|----------------|-------------|-------------|-------------|-----------------|
| 0.038158248    | 1.187586617 | 0.299095594 | 0.427635846 | 0.282412511     |
| 0.039763815    | 1.094120162 | 0.444661925 | 1.172718043 | 1.110567406     |
| 0.036092653    | 0.920971562 | 0.218566615 | 1.658873676 | 0.894212666     |
| 0.028045539    | 2.750993532 | 0.247965387 | 5.823832605 | 2.006789849     |
| 0.0327546      | 1.40970249  | 0.265759025 | 0.5018853   | 0.04896722      |
| 0.028063579    | 3.836570064 | 0.572074675 | 0.350622211 | 0.16716583      |
| 0.026187754    | 1.063606463 | 0.263443851 | 3.244375315 | 2.290441829     |
| 0.029688094    | 1.739907209 | 0.286453173 | 2.149403605 | 1.969151207     |
| 0.039623588    | 2.972905856 | 0.649926313 | 2.265425379 | 7.145128372     |
| 0.026060787    | 1.266105612 | 0.242131335 | 0.559219934 | 0.137540367     |
| 0.027583708    | 2.197435143 | 0.39584812  | 0.496148791 | 0.04638046      |
| 0.297738649    | 0.726747541 | 0.34536149  | 0.371579937 | 0.43611914      |
| 0.026688496    | 1.876928279 | 0.338370324 | 0.670902676 | 0.235492657     |
| 0.043055786    | 1.124229105 | 0.335246059 | 0.44420222  | 0.362314955     |
| 0.027281354    | 0.953790046 | 0.377540697 | 0.572175041 | 0.104479088     |
| 0.033677689    | 1.910821552 | 0.691499601 | 0.302666132 | 0.072485756     |
| 0.079723478    | 1.093177938 | 0.249991801 | 0.299003214 | 0.080195503     |
| 0.041142086    | 2.754244609 | 0.298035261 | 0.237394974 | 0.050456669     |
| 0.0328179      | 2.336426276 | 0.330001975 | 0.276682341 | 0.072774661     |
| 0.031777047    | 1.310937723 | 0.323109735 | 4.318417173 | 3.602142994     |

Table S1. RPPA Protein expression data of 20 PDGX

Brown et al.

| EGFR_pY1173-R-V | eIF4E-R-V   | eIF4G-R-C   | ER-alpha-R-V | ER-alpha_pS118-R-V |
|-----------------|-------------|-------------|--------------|--------------------|
| 0.747726553     | 0.91138423  | 6.837486664 | 0.107667543  | 0.601329141        |
| 0.774309263     | 0.925915475 | 11.53204654 | 0.095068687  | 0.559630745        |
| 0.884693626     | 0.756423857 | 5.68656112  | 0.08225504   | 0.544273068        |
| 1.266508462     | 0.945588246 | 5.525255221 | 0.069878731  | 0.519251516        |
| 0.82495824      | 0.929776314 | 7.87537098  | 0.080479194  | 0.57336764         |
| 0.723315089     | 0.930248212 | 11.28018025 | 0.078665747  | 0.539691409        |
| 1.1989784       | 0.864788488 | 6.243060768 | 0.079514675  | 0.536547451        |
| 1.23357454      | 0.758769214 | 4.341668455 | 0.077537049  | 0.562323982        |
| 2.099969463     | 1.026995054 | 9.651178672 | 0.079268725  | 0.508421697        |
| 0.734912007     | 0.969715928 | 10.29305997 | 0.085952115  | 0.517874155        |
| 0.753211012     | 0.760287655 | 8.744270042 | 0.079993466  | 0.542593987        |
| 0.701008211     | 0.866012118 | 1.555259853 | 0.381818303  | 0.863132471        |
| 0.795677882     | 0.663652598 | 6.494814312 | 0.085124367  | 0.495749532        |
| 0.755366032     | 1.286759402 | 9.150795031 | 0.094683523  | 0.567351894        |
| 0.81347504      | 0.812123761 | 5.499467676 | 0.085184585  | 0.540510047        |
| 0.872120909     | 0.83241406  | 8.042456994 | 0.106066607  | 0.575371945        |
| 0.815438583     | 0.906091635 | 2.893527875 | 0.162925894  | 0.648815655        |
| 0.78855473      | 0.843797546 | 7.749759724 | 0.085110649  | 0.537221646        |
| 0.883762492     | 0.891671132 | 3.712431    | 0.105944751  | 0.584450907        |
| 1.402753298     | 0.929504776 | 6.574164257 | 0.081849886  | 0.599655491        |

Table S1. RPPA Protein expression data of 20 PDGX

Brown et al.

| Fibronectin-R-V | FOX03a-R-C  | FoxM1-R-V   | Gab2-R-V    |
|-----------------|-------------|-------------|-------------|
| 11.16661675     | 0.213720465 | 0.341373673 | 1.246551328 |
| 4.567870886     | 0.198755995 | 0.273833854 | 2.157102529 |
| 12.52379492     | 0.167974363 | 0.088506778 | 2.308472506 |
| 8.670252304     | 0.207229652 | 0.335644634 | 1.700160425 |
| 14.84959871     | 0.165581802 | 0.177279883 | 2.46325473  |
| 8.75516171      | 0.1641098   | 0.344144056 | 1.772442199 |
| 9.035197671     | 0.158741332 | 0.232574634 | 2.541691653 |
| 8.536156491     | 0.178315489 | 0.207591846 | 0.851176217 |
| 9.28902905      | 0.169005914 | 0.274420991 | 1.11679311  |
| 10.69803277     | 0.187804023 | 0.305338773 | 3.287678921 |
| 22.8710716      | 0.165768923 | 0.28749947  | 1.069970581 |
| 4.979667306     | 0.628207294 | 0.275887804 | 0.659576485 |
| 29.05340802     | 0.179071842 | 0.280507988 | 0.632696692 |
| 4.808455264     | 0.192249059 | 0.359500773 | 1.01672132  |
| 35.27510321     | 0.185789043 | 0.279040189 | 1.696089204 |
| 36.4766671      | 0.183085547 | 0.112540796 | 0.996458612 |
| 19.19006653     | 0.283636621 | 0.129197505 | 1.077856041 |
| 9.884522357     | 0.176972946 | 0.547074496 | 1.631225932 |
| 15.46417675     | 0.176855207 | 0.142257234 | 2.744583741 |
| 8.104589979     | 0.155858758 | 0.254347548 | 2.778918269 |

| GSK3-alpha-beta_pS21_S9-R-V | GSK3_pS9-R-V | HER2_pY1248-R-C | HER3-R-V    |
|-----------------------------|--------------|-----------------|-------------|
| 1.672933026                 | 0.802513754  | 0.36891992      | 0.169227501 |
| 2.101051837                 | 1.245383677  | 0.75264764      | 0.18165819  |
| 2.316251968                 | 1.257056311  | 0.759495171     | 0.155981265 |
| 1.534301798                 | 1.521283201  | 1.423549153     | 0.151034631 |
| 1.343698116                 | 0.819289052  | 0.190845184     | 0.15465417  |
| 2.946095891                 | 1.890957504  | 0.479876312     | 0.154240319 |
| 2.774204796                 | 1.440943575  | 1.674229008     | 0.155486395 |
| 1.971098958                 | 1.455390006  | 1.305984839     | 0.287776323 |
| 1.897328258                 | 1.376542833  | 4.751866402     | 1.134171041 |
| 1.564519717                 | 0.986567497  | 0.35043286      | 1.316522948 |
| 2.462102398                 | 1.278445437  | 0.254550416     | 0.147198964 |
| 0.729504316                 | 0.475558323  | 0.436314        | 0.550036615 |
| 1.788207473                 | 1.063011941  | 0.392554359     | 0.14676772  |
| 1.907196954                 | 0.677384874  | 0.363337361     | 0.156893805 |
| 1.155167837                 | 0.75141743   | 0.280931439     | 0.169527804 |
| 1.523612438                 | 0.751520309  | 0.274549012     | 1.959132496 |
| 1.074011133                 | 0.766031024  | 0.206736579     | 0.795644438 |
| 2.624241116                 | 1.897630357  | 0.245159531     | 1.224405163 |
| 1.523713793                 | 1.392459643  | 0.24850708      | 0.894630223 |
| 3.318880745                 | 1.746323525  | 2.466663536     | 0.186054511 |

Table S1. RPPA Protein expression data of 20 PDGX

Brown et al.

| HER3_pY1298-R-C | IGFBP2-R-V  | INPP4B-G-E  | IRS1-R-V    |
|-----------------|-------------|-------------|-------------|
| 0.440221565     | 2.591872542 | 0.217990656 | 0.319927464 |
| 0.412452458     | 2.268147625 | 0.155968963 | 0.341835124 |
| 0.39142741      | 3.673546055 | 0.151508563 | 0.268323336 |
| 0.372410604     | 1.925970743 | 0.173943442 | 0.302740253 |
| 0.405324489     | 0.793963488 | 0.236698015 | 0.366512566 |
| 0.451337026     | 2.581987136 | 0.132360831 | 0.242626578 |
| 0.425604072     | 3.388683523 | 0.197109089 | 0.260872725 |
| 0.466212906     | 4.529141582 | 0.162563831 | 0.291532778 |
| 0.512029246     | 3.218931414 | 0.162555695 | 0.288945915 |
| 0.461273686     | 1.597052339 | 0.218660677 | 0.354836795 |
| 0.397067364     | 1.216552581 | 0.281464337 | 0.5011346   |
| 0.563646168     | 0.290471631 | 0.501335758 | 0.776199922 |
| 0.438728929     | 0.609037695 | 0.150318693 | 0.295497305 |
| 0.5167323       | 1.057114317 | 0.915456308 | 0.635441309 |
| 0.457092739     | 0.914324068 | 0.254333528 | 0.405328091 |
| 0.488313328     | 0.273497623 | 0.182935472 | 0.460927637 |
| 0.568708977     | 0.377103001 | 0.295217086 | 0.45492307  |
| 0.482906709     | 1.666734857 | 0.178065477 | 0.315560765 |
| 0.511555106     | 5.931202395 | 0.198241182 | 0.307399553 |
| 0.43092876      | 3.296142413 | 0.188905044 | 0.268580719 |



Table S1. RPPA Protein expression data of 20 PDGX

Brown et al.

| JNK_pT183_pT185-R-V | JNK2-R-C    | Lck-R-V     | MAPK_pT202_Y204-R-V |
|---------------------|-------------|-------------|---------------------|
| 0.369165257         | 0.33564802  | 0.801268934 | 0.179649693         |
| 0.296728222         | 0.328738497 | 0.760604302 | 0.24185852          |
| 0.368128346         | 0.297500996 | 0.701462995 | 0.278951674         |
| 0.329889578         | 0.33528711  | 0.870080223 | 0.900329441         |
| 0.325457034         | 0.346114599 | 0.866588751 | 0.394440681         |
| 0.372009181         | 0.297301082 | 0.446601823 | 0.427216063         |
| 0.352831686         | 0.328369513 | 0.680549211 | 0.683249092         |
| 0.372188244         | 0.413796167 | 0.603012586 | 0.337340371         |
| 0.361470039         | 0.318802661 | 0.471094024 | 0.115742888         |
| 0.327436086         | 0.414133115 | 0.698129833 | 0.170039586         |
| 0.296930663         | 0.477928415 | 0.963005948 | 0.164715909         |
| 0.579685098         | 0.503377121 | 0.630620673 | 0.290666817         |
| 0.353662144         | 0.301512345 | 0.610388341 | 0.359216209         |
| 0.336716956         | 0.527088994 | 0.688314231 | 0.200552661         |
| 0.32716328          | 0.487950172 | 0.695178974 | 0.28623522          |
| 0.367509231         | 0.391732572 | 0.533000985 | 0.110795668         |
| 0.482105834         | 0.4134329   | 0.863655078 | 0.129931561         |
| 0.339818991         | 0.426354675 | 0.572145124 | 0.070925637         |
| 0.408001728         | 0.35387687  | 0.39795276  | 0.11137867          |
| 0.385703083         | 0.3030658   | 0.595372635 | 0.842242982         |

Table S1. RPPA Protein expression data of 20 PDGX

Brown et al.

| MEK1-R-V    | MEK1_pS217_S221-R-V | MSH6-R-C    | mTOR-R-V    |
|-------------|---------------------|-------------|-------------|
| 0.25524432  | 0.088996204         | 2.342972347 | 1.916760503 |
| 0.527978783 | 0.117590855         | 3.26680091  | 3.487844827 |
| 0.381478379 | 0.059694934         | 2.788437144 | 2.827058831 |
| 0.60881309  | 0.178186304         | 2.319580608 | 1.163864279 |
| 0.498202693 | 0.080655529         | 2.466840154 | 2.273788004 |
| 0.744957584 | 0.142795881         | 4.856135215 | 2.073072061 |
| 0.395900646 | 0.080669987         | 2.820622478 | 2.601352326 |
| 0.418967344 | 0.0862435           | 4.275467794 | 2.113785933 |
| 0.343603724 | 0.070574907         | 4.442472682 | 2.080514055 |
| 0.326519053 | 0.085231222         | 3.534094037 | 2.114274569 |
| 0.512769466 | 0.113503788         | 4.132595014 | 1.896289429 |
| 0.374347481 | 0.215139718         | 0.762616014 | 1.292190278 |
| 0.383635419 | 0.102537753         | 2.8844548   | 1.840723734 |
| 0.42287043  | 0.092711866         | 1.601629699 | 1.577136886 |
| 0.534260378 | 0.093698486         | 2.986817477 | 1.633593663 |
| 0.443483591 | 0.074049384         | 2.400111864 | 2.475615475 |
| 0.157384229 | 0.087157231         | 1.96008135  | 1.60706449  |
| 0.318096406 | 0.065227911         | 5.94123769  | 2.530987449 |
| 0.383967914 | 0.058149824         | 2.189119203 | 0.905975439 |
| 0.43454221  | 0.079459143         | 3.00562021  | 2.916084921 |

Table S1. RPPA Protein expression data of 20 PDGX

Brown et al.

| mTOR_pS2448-R-E | MYH11-R-V   | N-Cadherin-R-V | NDRG1_pT346-R-V |
|-----------------|-------------|----------------|-----------------|
| 0.383221843     | 5.443902423 | 0.601813125    | 1.545494109     |
| 0.62024878      | 3.309291445 | 0.455550826    | 0.489882934     |
| 0.570982632     | 5.057897195 | 0.549584051    | 0.535364845     |
| 0.304374518     | 10.27147124 | 0.564284169    | 0.348033584     |
| 0.470728205     | 3.023521947 | 0.604280548    | 0.819708302     |
| 0.464906534     | 2.51528349  | 0.505926689    | 2.580370318     |
| 0.50671067      | 6.191793174 | 0.524282167    | 0.898710431     |
| 0.502819114     | 15.14581756 | 0.494715926    | 0.407834408     |
| 0.412301906     | 2.763894202 | 0.472036289    | 0.635973384     |
| 0.439162462     | 2.433748009 | 0.379626559    | 0.595377332     |
| 0.45176404      | 5.213064548 | 0.412222663    | 0.452751143     |
| 0.644633646     | 8.659268064 | 0.473384522    | 0.571562551     |
| 0.400075084     | 2.95573538  | 0.408436553    | 2.888738818     |
| 0.416338419     | 1.682259221 | 0.662998197    | 0.35069775      |
| 0.389403846     | 6.652706342 | 0.45454704     | 1.347150477     |
| 0.343529032     | 1.520965039 | 0.441081514    | 1.911879236     |
| 0.433777672     | 42.21886305 | 0.414620856    | 0.608791152     |
| 0.454749391     | 2.822263154 | 0.554413655    | 0.614221091     |
| 0.171014103     | 1.527075774 | 0.501982975    | 0.899217491     |
| 0.533921282     | 5.875483726 | 0.527260509    | 0.636040662     |

Table S1. RPPA Protein expression data of 20 PDGX

Brown et al.

| NF-kB-p65_pS536-R-C | NF2-R-C     | Notch1-R-V  | Notch3-R-E  | p27-R-V     |
|---------------------|-------------|-------------|-------------|-------------|
| 0.27649226          | 1.766018849 | 0.319492929 | 0.547731133 | 0.199913745 |
| 0.296647142         | 1.237057229 | 0.399093349 | 0.745472687 | 0.263664088 |
| 0.525020745         | 1.45391945  | 0.39800268  | 0.491678223 | 0.247774633 |
| 0.259177224         | 1.422276089 | 0.44645025  | 0.387183579 | 0.210022362 |
| 0.194032688         | 2.015908179 | 0.503604356 | 1.550362248 | 0.215787703 |
| 0.32095397          | 1.701840414 | 0.611533718 | 0.31857168  | 0.197051326 |
| 0.285276739         | 1.606247265 | 0.496911563 | 0.548148767 | 0.233742229 |
| 0.306044025         | 1.713552091 | 0.337717599 | 0.908201569 | 0.219466417 |
| 0.376417983         | 1.796684219 | 0.402848943 | 0.367899555 | 0.207520863 |
| 0.320473859         | 1.275872153 | 0.543928064 | 1.314624005 | 0.206363408 |
| 0.357524129         | 2.292748567 | 0.285582364 | 1.119945592 | 0.322252124 |
| 0.316868081         | 0.698815683 | 0.310374853 | 0.499908234 | 0.923306917 |
| 0.364545586         | 3.058984626 | 0.174114439 | 0.210419586 | 0.18937907  |
| 0.567569287         | 1.920559063 | 0.179737558 | 0.261432739 | 0.192162263 |
| 0.284034316         | 1.752162674 | 0.302325949 | 1.269900017 | 0.20908557  |
| 0.420458879         | 1.570581628 | 0.245171314 | 0.40236802  | 0.248890766 |
| 0.230738526         | 0.873593736 | 0.255695736 | 0.456465634 | 0.264745235 |
| 0.182425847         | 1.667719164 | 0.500761    | 0.472975347 | 0.236104317 |
| 0.170444314         | 1.693449912 | 0.335517539 | 0.261611755 | 0.243898828 |
| 0.274409958         | 1.73530756  | 0.508496915 | 0.589996111 | 0.22640775  |

Table S1. RPPA Protein expression data of 20 PDGX

Brown et al.

| p27_pT157-R-C | p27_pT198-R-V | p38_MAPK-R-C | p38_pT180_Y182-R-V |
|---------------|---------------|--------------|--------------------|
| 0.475273104   | 0.256914392   | 1.128163804  | 0.559938318        |
| 0.47256317    | 0.258033472   | 1.098232033  | 0.288150308        |
| 0.471326285   | 0.248399368   | 0.602134367  | 0.282867821        |
| 0.489425651   | 0.277323634   | 1.036322562  | 0.325182083        |
| 0.471165464   | 0.261887468   | 1.042480659  | 0.250972888        |
| 0.444197764   | 0.24604735    | 0.641894984  | 0.371342831        |
| 0.480787713   | 0.259572266   | 0.88790075   | 0.454423659        |
| 0.492159322   | 0.255609847   | 0.716544363  | 0.28055114         |
| 0.542660035   | 0.270355363   | 0.748900997  | 0.246872152        |
| 0.469012031   | 0.250336834   | 0.995823338  | 0.374958431        |
| 0.446282006   | 0.256019734   | 1.15725502   | 0.3266352          |
| 0.636622557   | 0.390037044   | 1.041467707  | 0.458240928        |
| 0.441313468   | 0.243606261   | 0.749583296  | 0.343162144        |
| 0.479081229   | 0.233601777   | 1.084028803  | 0.295177457        |
| 0.512905389   | 0.263327719   | 1.013362493  | 0.251983257        |
| 0.509251648   | 0.300435316   | 0.668276302  | 0.221894664        |
| 0.517350901   | 0.291340931   | 1.141448346  | 0.27618966         |
| 0.519417164   | 0.306876595   | 0.86119071   | 0.277117959        |
| 0.526722183   | 0.287035831   | 0.54539994   | 0.216809849        |
| 0.47925176    | 0.266191844   | 0.929930121  | 0.416843554        |

Table S1. RPPA Protein expression data of 20 PDGX

Brown et al.

| p53-R-E     | p70S6K-R-V  | p70S6K_pT389-R-V | p90RSK_pT359_S363-R-C |
|-------------|-------------|------------------|-----------------------|
| 0.261671164 | 0.458821827 | 0.116122073      | 0.415486587           |
| 0.284563989 | 0.516168828 | 0.243501293      | 0.409550259           |
| 0.254573153 | 0.275109712 | 0.423766104      | 0.356695802           |
| 0.220141639 | 0.405125216 | 0.200439441      | 0.431045356           |
| 0.239876593 | 0.407929285 | 0.372591952      | 0.383375542           |
| 0.223311087 | 0.33718666  | 0.247319509      | 0.391402062           |
| 0.246858921 | 0.366427106 | 0.295747587      | 0.456826807           |
| 0.238721458 | 0.344230098 | 0.413328438      | 0.389987027           |
| 0.238031388 | 0.437137399 | 0.197272944      | 0.383309027           |
| 0.242492401 | 0.493255782 | 0.302169799      | 0.404411695           |
| 0.213306995 | 0.467852127 | 0.389603141      | 0.343348857           |
| 0.615622814 | 0.581092751 | 0.388432694      | 0.807690463           |
| 0.845197342 | 0.309002146 | 0.20514788       | 0.364574184           |
| 0.247322263 | 0.630045231 | 0.242147226      | 0.419656658           |
| 0.236862429 | 0.470620907 | 0.336732632      | 0.392837074           |
| 0.235257073 | 0.437032307 | 0.115019063      | 0.358720176           |
| 0.369093111 | 0.39565045  | 0.289003484      | 0.456625367           |
| 0.36841914  | 0.47029176  | 0.271452112      | 0.314120611           |
| 0.275751886 | 0.334024528 | 0.152706918      | 0.353693927           |
| 0.217435025 | 0.400413542 | 0.260932681      | 0.487526939           |

Table S1. RPPA Protein expression data of 20 PDGX

Brown et al.

| Paxillin-R-V | PDCD4-R-C   | PDK1-R-V    | PDK1_pS241-R-V | PEA15-R-V   |
|--------------|-------------|-------------|----------------|-------------|
| 0.332869846  | 0.977131631 | 0.291459569 | 0.86941204     | 1.816575884 |
| 0.258016564  | 0.936223135 | 0.278117653 | 0.840505025    | 1.241598478 |
| 0.249687071  | 1.017228083 | 0.207341913 | 0.529284181    | 2.224139657 |
| 0.61774477   | 0.900732526 | 0.258990884 | 0.689625741    | 1.919287602 |
| 0.402393274  | 0.997120265 | 0.262261761 | 0.812021406    | 1.340105809 |
| 0.456432831  | 0.883538566 | 0.295509245 | 0.90564932     | 0.982406275 |
| 0.278921804  | 0.83082515  | 0.252048765 | 0.776543188    | 1.770514186 |
| 0.364800907  | 0.775410159 | 0.269766431 | 0.583434731    | 1.028474021 |
| 0.323349708  | 1.320851564 | 0.222860817 | 0.581566994    | 0.678222665 |
| 0.478771362  | 1.262235035 | 0.246286256 | 0.776335164    | 1.004457525 |
| 0.391503839  | 0.998558122 | 0.2755971   | 0.827860508    | 0.775742728 |
| 0.331791292  | 0.915823229 | 0.597607539 | 0.616313745    | 0.693886979 |
| 0.373814718  | 1.11276857  | 0.237884352 | 0.680027726    | 0.842788573 |
| 0.658149646  | 1.242761037 | 0.375861113 | 1.147492475    | 1.534416406 |
| 0.440407323  | 1.047826666 | 0.23486027  | 0.885055495    | 0.973073702 |
| 0.267081334  | 1.458885257 | 0.256382298 | 0.700181921    | 0.819990583 |
| 0.283911928  | 1.233756522 | 0.467046542 | 0.604025421    | 0.824151299 |
| 0.323831929  | 1.166404819 | 0.258330036 | 0.625364037    | 0.803903891 |
| 0.581209792  | 1.180989932 | 0.224036026 | 0.530331931    | 0.827558937 |
| 0.284024408  | 0.781277295 | 0.232922599 | 0.786753906    | 2.201548108 |

Table S1. RPPA Protein expression data of 20 PDGX

Brown et al.

| PEA15_pS116-R-V | PI3K-p110-alpha-R-C | PI3K-p85-R-V | PKC-alpha_pS657-R-V |
|-----------------|---------------------|--------------|---------------------|
| 0.378982263     | 0.398267419         | 2.330883318  | 2.533018748         |
| 0.315506505     | 0.361466374         | 2.663218541  | 1.777262023         |
| 0.390100708     | 0.269363941         | 2.053179986  | 3.636020254         |
| 1.489604067     | 0.186067057         | 1.821876949  | 1.980626182         |
| 0.52459432      | 0.273103607         | 2.306630694  | 3.973249831         |
| 2.057009768     | 0.25767571          | 1.431046033  | 2.44816105          |
| 0.388051598     | 0.294413899         | 1.888842021  | 4.379499782         |
| 0.656449224     | 0.288111414         | 1.542704357  | 1.661268908         |
| 0.757146426     | 0.277559254         | 1.956898915  | 1.672518179         |
| 0.279230522     | 0.497552261         | 2.362387021  | 2.553779146         |
| 0.59314157      | 0.291802155         | 2.258123135  | 1.463222087         |
| 0.669353462     | 0.40120537          | 1.393819242  | 0.617065839         |
| 0.892110431     | 0.305070746         | 3.361156524  | 1.517373297         |
| 0.313276905     | 0.491409891         | 3.298819205  | 2.29493022          |
| 0.303146181     | 0.477214826         | 1.787498725  | 1.40551979          |
| 0.431555384     | 0.308576764         | 1.602873414  | 2.070982789         |
| 0.454386125     | 0.258426944         | 2.058871445  | 0.840441045         |
| 0.855047129     | 0.490592552         | 2.175782405  | 2.321967107         |
| 1.324576666     | 0.189246124         | 1.251390557  | 1.206703507         |
| 0.334830669     | 0.310328765         | 1.997642335  | 5.162826789         |



Table S1. RPPA Protein expression data of 20 PDGX

Brown et al.

| PKC-delta_pS664-R-V | PKC-pan_Betall_pS660-R-V | PR-R-V      |
|---------------------|--------------------------|-------------|
| 0.40925845          | 6.084560787              | 0.614688922 |
| 0.331083092         | 5.857789479              | 0.583349565 |
| 0.453455038         | 8.286408255              | 0.578953446 |
| 0.348815512         | 4.277027889              | 0.593082875 |
| 0.486286851         | 6.218082634              | 0.541750897 |
| 0.32019264          | 6.9455886                | 0.558678006 |
| 0.547643673         | 7.166123259              | 0.621857953 |
| 0.312817381         | 3.842428216              | 0.589643393 |
| 0.342606878         | 4.427332578              | 0.566251729 |
| 0.380361318         | 5.714068223              | 0.594599691 |
| 0.316753005         | 6.539737011              | 0.535822713 |
| 0.627215813         | 1.97692783               | 0.801559479 |
| 0.329082131         | 5.788260607              | 0.585097769 |
| 0.418227662         | 10.7542809               | 0.524193943 |
| 0.348154293         | 4.65685807               | 0.534421589 |
| 0.363308128         | 5.158837318              | 0.62326672  |
| 0.426635329         | 4.0058509                | 0.64635699  |
| 0.371975106         | 4.149272311              | 0.614892342 |
| 0.349921226         | 1.621250972              | 0.696801321 |
| 0.58551463          | 9.007009992              | 0.566076941 |

Table S1. RPPA Protein expression data of 20 PDGX

Brown et al.

| PRAS40_pT246-R-V | PTEN-R-V    | Rab11-R-V   | Raptor-R-V  | Rb_pS807_S811-R-V |
|------------------|-------------|-------------|-------------|-------------------|
| 2.399819794      | 1.978632923 | 0.897002052 | 0.184261047 | 0.096547273       |
| 3.607432344      | 0.631132633 | 0.741029776 | 0.21047402  | 0.053348566       |
| 2.649996071      | 1.312648893 | 0.833031645 | 0.19188876  | 0.069574796       |
| 2.628877681      | 0.793572017 | 0.760254916 | 0.132376229 | 0.131249679       |
| 2.81281247       | 1.49085003  | 0.802959877 | 0.163957049 | 0.096450554       |
| 3.609218252      | 0.403907966 | 0.869450094 | 0.162150598 | 0.176057341       |
| 2.880558567      | 1.201244488 | 0.931603843 | 0.197365797 | 0.118733785       |
| 2.418058084      | 1.322593112 | 0.686163588 | 0.191843532 | 0.124073146       |
| 2.993651186      | 0.269260593 | 0.705617813 | 0.162713032 | 0.112615243       |
| 3.135581845      | 2.860162816 | 0.871841306 | 0.156953815 | 0.082831446       |
| 3.037761598      | 0.854490712 | 0.721049891 | 0.210549834 | 0.057672478       |
| 1.024033413      | 0.763682659 | 1.190654138 | 0.126104839 | 0.029521473       |
| 2.061693062      | 0.548134961 | 1.200896395 | 0.137111531 | 0.079106991       |
| 1.988340685      | 0.727689526 | 0.784413138 | 0.154195297 | 0.079543109       |
| 1.89396574       | 1.972447335 | 0.829725011 | 0.198832548 | 0.053536483       |
| 1.9736989        | 0.654174181 | 0.914561104 | 0.21181782  | 0.072680794       |
| 1.35448793       | 1.381342794 | 1.471822314 | 0.154692396 | 0.028832609       |
| 2.704258151      | 0.375002049 | 0.876418487 | 0.213596225 | 0.032003983       |
| 1.849474361      | 0.416651141 | 1.898083957 | 0.146969841 | 0.053368867       |
| 3.423303561      | 1.280493798 | 0.855188134 | 0.202370256 | 0.144369136       |

Table S1. RPPA Protein expression data of 20 PDGX

Brown et al.

| RBM15-R-V   | Rictor-R-C  | Rictor_pT1135-R-V | S6_pS235_S236-R-V |
|-------------|-------------|-------------------|-------------------|
| 0.832141303 | 0.595832414 | 0.779580553       | 1.078185843       |
| 0.944824182 | 0.824166168 | 0.873597212       | 0.955265906       |
| 1.1647247   | 0.747308362 | 1.249796626       | 2.164555828       |
| 1.065496663 | 0.4025383   | 0.812333897       | 1.364907514       |
| 0.840925068 | 0.741536996 | 0.865882503       | 1.447041892       |
| 0.733733716 | 0.604370333 | 0.896212171       | 2.321814745       |
| 0.952926056 | 0.663451259 | 0.87085004        | 0.99729583        |
| 0.9801168   | 0.629612095 | 0.849182391       | 1.753715999       |
| 1.026159557 | 0.694722771 | 0.826909418       | 0.995741233       |
| 0.766076031 | 0.771669875 | 0.985978832       | 1.107813204       |
| 0.852166761 | 0.949935246 | 1.130043822       | 1.305923205       |
| 0.251781954 | 0.674455648 | 0.707297728       | 0.707971738       |
| 0.850413632 | 0.656696831 | 0.929971796       | 0.857204958       |
| 0.757120838 | 1.035276534 | 1.165338227       | 0.89396618        |
| 0.735501031 | 0.927678371 | 1.094401202       | 1.31773796        |
| 0.850413632 | 0.855353268 | 0.934690406       | 0.269570715       |
| 0.545253966 | 0.513130685 | 0.954635335       | 0.75411529        |
| 1.002368789 | 0.969821774 | 0.95882184        | 0.782657599       |
| 0.725254841 | 0.315945111 | 0.823470631       | 0.28662588        |
| 1.113738199 | 0.627008065 | 0.770176473       | 0.856014504       |

Table S1. RPPA Protein expression data of 20 PDGX

Brown et al.

| S6_pS240_S244-R-V | Smad1-R-V   | Smad3-R-V   | Src_pY416-R-E | Src_pY527-R-V |
|-------------------|-------------|-------------|---------------|---------------|
| 1.052070541       | 0.787377989 | 0.715515937 | 0.892060608   | 1.049708179   |
| 0.820437716       | 0.756122762 | 0.699854807 | 0.886871378   | 0.897658468   |
| 1.178531418       | 0.884169755 | 0.796516337 | 1.364989766   | 0.638915322   |
| 1.223225956       | 0.642416347 | 0.72343638  | 1.602795465   | 0.660978724   |
| 1.121568687       | 0.652993798 | 0.79961537  | 0.608378281   | 0.874889447   |
| 1.939205562       | 0.80264421  | 0.712373763 | 1.22550131    | 0.550594762   |
| 0.792983601       | 0.703002045 | 0.739228649 | 2.336897152   | 1.081636824   |
| 1.285341356       | 0.776584815 | 0.720530028 | 1.672629474   | 0.770976498   |
| 0.919648067       | 0.77292486  | 0.910541415 | 4.29475033    | 1.489958547   |
| 0.920414005       | 0.648209837 | 0.690433738 | 0.712715496   | 1.33191017    |
| 0.970455676       | 0.819064922 | 0.835215738 | 0.592269363   | 1.191072968   |
| 0.615495923       | 0.729632416 | 0.840990097 | 0.636080984   | 0.799843855   |
| 0.819069066       | 0.683935631 | 0.673291991 | 1.472426907   | 0.706101354   |
| 0.764276931       | 0.825261306 | 0.665553425 | 0.670742916   | 0.563352572   |
| 0.874791802       | 0.649944618 | 0.803146324 | 0.55894809    | 1.133492434   |
| 0.349810373       | 0.744698345 | 0.817812066 | 0.886377982   | 0.796603141   |
| 0.834646698       | 0.743444324 | 0.732737337 | 0.50936939    | 0.87271859    |
| 1.127451892       | 0.832896071 | 0.858312954 | 0.648308365   | 1.001402472   |
| 0.393575482       | 0.810181879 | 0.857708358 | 0.648083441   | 0.465737296   |
| 0.703380834       | 0.732429396 | 0.720530028 | 3.013467885   | 1.074364988   |

Table S1. RPPA Protein expression data of 20 PDGX

Brown et al.

| STAT3_pY705-R-V | STAT5-alpha-R-V | Stathmin-R-V | TAZ-R-V     | TAZ_pS89-R-E |
|-----------------|-----------------|--------------|-------------|--------------|
| 0.496329346     | 0.773769418     | 0.70643539   | 0.568370653 | 1.686302837  |
| 0.4202924       | 1.457551821     | 0.610682245  | 0.439866657 | 1.515267809  |
| 0.47317153      | 0.734425483     | 0.610703857  | 0.503034887 | 2.935628873  |
| 0.448645216     | 0.611352858     | 0.687936335  | 0.613910814 | 4.004774593  |
| 0.539442278     | 1.061987426     | 0.575452634  | 0.59555703  | 2.487583895  |
| 0.506054942     | 0.913705765     | 0.65866821   | 0.79585199  | 5.869346821  |
| 0.590645519     | 0.666729114     | 0.760732028  | 0.470228026 | 1.848998354  |
| 0.572827477     | 0.625489613     | 0.579770698  | 0.521293764 | 3.221961913  |
| 0.653369973     | 0.608592825     | 0.657508513  | 0.61221428  | 3.661568098  |
| 0.601388676     | 1.363558463     | 0.698809115  | 1.065308637 | 1.506381918  |
| 0.482399151     | 1.538230146     | 0.543912875  | 0.463497192 | 4.371907122  |
| 0.651006606     | 1.159098752     | 1.029610046  | 0.768674479 | 1.140420711  |
| 0.430887501     | 0.937179767     | 0.59990232   | 0.670016635 | 2.868861658  |
| 0.534772028     | 1.099991585     | 0.592416816  | 0.839795166 | 1.408761531  |
| 0.555469455     | 0.942866874     | 0.620929157  | 0.57012177  | 1.477686426  |
| 0.354420685     | 0.642095497     | 0.668114908  | 0.610029398 | 2.466861111  |
| 0.635923917     | 1.307776596     | 0.766682993  | 0.601262914 | 1.946875765  |
| 0.329689787     | 0.504278622     | 1.016743085  | 0.507205326 | 3.527784028  |
| 0.36389279      | 0.417235357     | 0.95924738   | 0.772113308 | 2.830876871  |
| 0.631275769     | 0.653044387     | 0.749554642  | 0.440950466 | 1.46314708   |

Table S1. RPPA Protein expression data of 20 PDGX

Brown et al.

| TIGAR-R-V   | TRFC-R-V    | TSC1-R-C    | TTF1-R-V    | Tuberin-R-E |
|-------------|-------------|-------------|-------------|-------------|
| 0.414443129 | 2.800350098 | 3.282821994 | 0.241349518 | 1.340976447 |
| 0.312053021 | 8.072545736 | 3.531837783 | 0.256215002 | 2.248871056 |
| 0.353690474 | 13.55668955 | 3.200227096 | 0.235625494 | 0.614204937 |
| 0.349760716 | 11.29886386 | 1.815197663 | 0.357556609 | 1.077822445 |
| 0.329550542 | 6.761104245 | 2.729608226 | 0.248855479 | 1.587326275 |
| 0.300131453 | 9.924546814 | 3.588329958 | 0.381298484 | 1.726719901 |
| 0.310532167 | 4.043203504 | 3.271652547 | 0.237700966 | 1.652475423 |
| 0.370706909 | 13.37609025 | 2.215346849 | 0.314889385 | 1.391193839 |
| 0.348225946 | 15.22955316 | 2.335892745 | 0.314011379 | 1.91172335  |
| 0.349760716 | 3.287429208 | 4.206176301 | 0.224207568 | 2.018102155 |
| 0.342539238 | 8.285841001 | 2.864888985 | 0.277020269 | 2.799953402 |
| 0.729134752 | 1.263673703 | 1.148102698 | 0.587775089 | 0.683944374 |
| 0.36763086  | 13.81116967 | 3.685538684 | 0.34400885  | 1.253076211 |
| 0.342619793 | 1.884269747 | 3.070503394 | 0.247611448 | 1.730064642 |
| 0.35146657  | 1.418581578 | 3.753803878 | 0.217061899 | 1.448282308 |
| 0.382201923 | 15.31689698 | 2.065089521 | 0.277544247 | 1.423569686 |
| 0.387580867 | 1.078522732 | 1.879843023 | 0.298119274 | 0.626731545 |
| 0.349514493 | 13.32914016 | 1.973646189 | 0.396111115 | 1.366613426 |
| 0.35448733  | 7.551689487 | 2.02638809  | 0.355363495 | 1.016771999 |
| 0.307519308 | 4.13856639  | 3.960715133 | 0.215645503 | 2.356503059 |

Table S1. RPPA Protein expression data of 20 PDGX

Brown et al.

| VEGFR2-R-V  | XRCC1-R-E   | YAP-R-E     | YAP_pS127-R-C | YB-1-R-V    |
|-------------|-------------|-------------|---------------|-------------|
| 1.594080217 | 0.247481674 | 0.585854861 | 0.762383641   | 1.079655148 |
| 1.220063    | 0.199465238 | 0.553585964 | 1.182431312   | 0.803055435 |
| 1.252558315 | 0.165662619 | 0.67500038  | 1.502957424   | 1.091031608 |
| 0.940632897 | 0.171438391 | 0.733151087 | 1.447134083   | 1.619299591 |
| 1.111242438 | 0.18019961  | 0.607325073 | 1.179718158   | 1.503694345 |
| 1.970062245 | 0.169498992 | 0.562884953 | 0.988536579   | 2.086445414 |
| 1.114799981 | 0.167393874 | 0.60536492  | 0.989248089   | 0.983660437 |
| 0.909629732 | 0.217612388 | 0.561169873 | 0.937943739   | 1.464932944 |
| 2.033704789 | 0.17251401  | 0.62605112  | 1.121258162   | 1.466196893 |
| 1.991905838 | 0.182824924 | 0.690912355 | 1.557954157   | 1.105636107 |
| 2.775067144 | 0.202367075 | 0.480528628 | 0.785822257   | 1.754074785 |
| 0.694243549 | 0.484811071 | 0.808169198 | 1.102057803   | 0.924808119 |
| 2.295395955 | 0.174973982 | 0.673234939 | 1.226250469   | 1.650711757 |
| 1.832109975 | 0.200075256 | 0.714222889 | 1.826263228   | 0.983919184 |
| 1.415230941 | 0.182447778 | 0.741443304 | 1.232995184   | 1.311928674 |
| 2.46949111  | 0.195086007 | 0.735050684 | 0.860715712   | 1.792451567 |
| 1.149775231 | 0.231594449 | 0.789372755 | 1.384668634   | 1.567903816 |
| 0.92302375  | 0.235529084 | 0.60043951  | 1.111805472   | 1.554851456 |
| 0.386693931 | 0.188734897 | 0.736162388 | 0.217502358   | 1.766500995 |
| 0.972704607 | 0.172009729 | 0.646382161 | 0.821733765   | 0.866013088 |

YB-1\_pS102-R-V

0.595429681  
0.503472048  
0.690573321  
0.738625691  
0.604931575  
0.603047734  
0.628190735  
0.576881737  
0.528255991  
0.628256313  
0.597386184  
0.601927923  
0.571709342  
0.543270537  
0.682651989  
0.799540546  
0.765990566  
0.545240857  
0.865013878  
0.592073786

---



Table S2. RPPA Protein expression data of 15 Primary Tumors

Brown et al.

| Sample Source | Sample ID | 14-3-3_beta-R-V | 14-3-3_epsilon-M-C | 14-3-3_zeta-R-V |
|---------------|-----------|-----------------|--------------------|-----------------|
| Primary Tumor | 08-0308   | 0.14117186      | 0.177491272        | 0.464609859     |
| Primary Tumor | 08-0500   | 0.069109967     | 0.223926732        | 0.36414338      |
| Primary Tumor | 09-0155   | 0.13764497      | 0.175494595        | 0.429420701     |
| Primary Tumor | 09-0211   | 0.198172653     | 0.225645791        | 0.733438883     |
| Primary Tumor | 09-0584   | 0.094412816     | 0.273899908        | 0.579392633     |
| Primary Tumor | 10-0171   | 0.064084467     | 0.236669965        | 0.526407814     |
| Primary Tumor | 08-0430   | 0.177001427     | 0.19498062         | 0.479810725     |
| Primary Tumor | 09-0362   | 0.125761354     | 0.186020649        | 0.479791483     |
| Primary Tumor | 09-0500   | 0.102618775     | 0.192383241        | 0.60884472      |
| Primary Tumor | 09-0627   | 0.133063153     | 0.26808435         | 0.516174098     |
| Primary Tumor | 11-0040   | 0.150187958     | 0.164199015        | 0.447168536     |
| Primary Tumor | 08-0478   | 0.137753133     | 0.193077991        | 0.490413931     |
| Primary Tumor | 08-0499   | 0.064663038     | 0.158297656        | 0.44494516      |
| Primary Tumor | 08-0624   | 0.161693251     | 0.184326086        | 0.445861488     |
| Primary Tumor | 10-0021   | 0.149226718     | 0.180938946        | 0.429607529     |

Table S2. RPPA Protein expression data of 15 Primary Tumors

Brown et al.

| 4E-BP1-R-V  | 4E-BP1_pS65-R-V | 4E-BP1_pT37_T46-R-V | 53BP1-R-V   | A-Raf-R-V   |
|-------------|-----------------|---------------------|-------------|-------------|
| 0.468656996 | 0.363342064     | 0.216936568         | 0.306511127 | 0.220301021 |
| 0.795546255 | 0.841780105     | 1.212974156         | 0.18732456  | 0.095094453 |
| 0.468895753 | 0.45203963      | 0.470659847         | 1.059337846 | 0.227077586 |
| 0.545807739 | 0.653536199     | 0.192068452         | 0.745384035 | 0.339867736 |
| 0.317720733 | 0.31579812      | 0.248487095         | 0.159657804 | 0.140926056 |
| 0.504181641 | 0.448247851     | 0.5370653           | 0.442720832 | 0.211640375 |
| 0.461576265 | 0.366899812     | 0.211967728         | 0.297390606 | 0.213748965 |
| 0.472335565 | 0.432898933     | 0.633847832         | 0.379923208 | 0.244646946 |
| 0.476054193 | 0.418327454     | 0.523579201         | 0.177729166 | 0.138058064 |
| 0.406939937 | 0.410288999     | 0.454515159         | 0.256874775 | 0.163222002 |
| 0.493446114 | 0.516480105     | 0.568946311         | 1.197631772 | 0.221929528 |
| 0.506737849 | 0.359537306     | 0.354524292         | 0.713502969 | 0.131546428 |
| 0.641253642 | 0.832900514     | 1.263076528         | 0.194057933 | 0.191588899 |
| 0.473261741 | 0.436817785     | 0.441242147         | 0.982714572 | 0.244111529 |
| 0.347498502 | 0.611425562     | 0.475153953         | 1.754825286 | 0.264836577 |

Table S2. RPPA Protein expression data of 15 Primary Tumors

Brown et al.

| ACC_pS79-R-V | ACC1-R-E    | ACVRL1-R-C  | ADAR1-M-V   | Akt-R-V     |
|--------------|-------------|-------------|-------------|-------------|
| 0.242596168  | 0.296072411 | 0.176756939 | 0.13504676  | 0.627598129 |
| 0.07699851   | 1.24352298  | 0.259640123 | 0.142253865 | 0.182083757 |
| 0.291460672  | 2.467338097 | 0.139718354 | 0.142736104 | 0.764680993 |
| 0.138642143  | 0.744582949 | 0.182077623 | 0.238539509 | 1.095968836 |
| 0.106505546  | 0.409290358 | 0.226362106 | 0.15996066  | 0.436589764 |
| 0.22046371   | 2.42499487  | 0.15987732  | 0.144568399 | 0.807611691 |
| 0.240564677  | 0.286285954 | 0.171515999 | 0.132199639 | 0.619526229 |
| 0.133475396  | 2.04033135  | 0.174362195 | 0.156179531 | 0.535687635 |
| 0.05573402   | 1.582360468 | 0.248271183 | 0.210333405 | 0.390267492 |
| 0.093606397  | 0.988312933 | 0.229115865 | 0.170156369 | 0.355422604 |
| 0.247984247  | 1.868866613 | 0.125993954 | 0.142645618 | 0.701661361 |
| 0.299026724  | 0.669487211 | 0.181193174 | 0.145467156 | 0.584329764 |
| 0.225804977  | 2.064215293 | 0.180230377 | 0.113924924 | 0.667528481 |
| 0.277257127  | 2.508698959 | 0.148027717 | 0.156055781 | 0.726067424 |
| 0.27811861   | 1.895008092 | 0.13238915  | 0.198407468 | 0.810296209 |

Table S2. RPPA Protein expression data of 15 Primary Tumors

Brown et al.

| Akt_pS473-R-V | Akt_pT308-R-V | AMPK_alpha-R-C | AMPK_pT172-R-V | Annexin_I-M-V |
|---------------|---------------|----------------|----------------|---------------|
| 0.31003056    | 0.302812946   | 0.291281906    | 0.053121073    | 0.389425767   |
| 0.969437413   | 1.167966059   | 0.502351533    | 0.043244997    | 0.195364551   |
| 4.737343747   | 1.997538944   | 0.369263061    | 0.052993971    | 0.203649674   |
| 1.077975694   | 0.673409151   | 0.322341019    | 0.058883723    | 0.092766358   |
| 0.333383755   | 0.41566172    | 0.280977777    | 0.078477584    | 0.151493994   |
| 2.334392703   | 1.927695537   | 0.383734924    | 0.045545044    | 0.28305298    |
| 0.304924244   | 0.293197018   | 0.292576108    | 0.052160773    | 0.427500335   |
| 2.378643362   | 1.74674192    | 0.536706419    | 0.054542194    | 0.176156617   |
| 1.338429533   | 1.460515309   | 0.584797811    | 0.102850895    | 0.135726771   |
| 0.869685349   | 0.875091451   | 0.42212578     | 0.067972625    | 0.240311668   |
| 2.080903587   | 1.577674265   | 0.373851981    | 0.053520901    | 0.118368897   |
| 0.714267412   | 0.616554807   | 0.334404718    | 0.058670681    | 0.110057606   |
| 2.133729017   | 1.616772913   | 0.29452629     | 0.043548435    | 0.266397266   |
| 3.530440167   | 2.044770928   | 0.343376087    | 0.056306126    | 0.229663207   |
| 2.202547361   | 1.478941263   | 0.381898528    | 0.057027407    | 0.101659908   |

Table S2. RPPA Protein expression data of 15 Primary Tumors

Brown et al.

| Annexin_VII-M-V | AR-R-V      | ARHI-M-C    | ATP5H-M-C   | B-Raf-M-C   |
|-----------------|-------------|-------------|-------------|-------------|
| 0.118485454     | 0.148378606 | 0.136976074 | 0.11101054  | 0.706229986 |
| 0.0810968       | 0.127008229 | 0.172402015 | 0.112631345 | 0.767929893 |
| 0.099976134     | 0.118221787 | 0.130573542 | 0.09073432  | 1.175604979 |
| 0.138437716     | 0.138444365 | 0.152396452 | 0.083874172 | 1.536987233 |
| 0.149932356     | 0.194531226 | 0.190364041 | 0.112744977 | 0.613020984 |
| 0.152404733     | 0.105829171 | 0.128751284 | 0.086775582 | 1.258438078 |
| 0.116441666     | 0.147927841 | 0.137226902 | 0.098864151 | 0.666631873 |
| 0.097538123     | 0.129371623 | 0.138431646 | 0.10498966  | 0.89653516  |
| 0.092480905     | 0.173814611 | 0.192183437 | 0.12143676  | 0.317766453 |
| 0.101770269     | 0.19763388  | 0.171626281 | 0.124768936 | 0.816485103 |
| 0.104894937     | 0.134635004 | 0.116610869 | 0.09825305  | 1.666086185 |
| 0.117495505     | 0.163855954 | 0.143263223 | 0.103155182 | 1.722336079 |
| 0.129537135     | 0.176863513 | 0.163117823 | 0.076571357 | 0.897976043 |
| 0.120987325     | 0.13583202  | 0.13367141  | 0.087501045 | 1.200162137 |
| 0.092035232     | 0.12534656  | 0.112575933 | 0.089631641 | 1.289237558 |

Table S2. RPPA Protein expression data of 15 Primary Tumors

Brown et al.

| B-Raf_pS445-R-V | Bad_pS112-R-V | Bak-R-C     | BAP1-M-V    | Bax-R-V     |
|-----------------|---------------|-------------|-------------|-------------|
| 0.27241515      | 0.239284857   | 0.195960204 | 0.105529841 | 0.649802455 |
| 0.238534876     | 0.355034723   | 0.322331461 | 0.120013946 | 0.748706505 |
| 0.320050879     | 0.262344174   | 0.183832234 | 0.127048747 | 0.555226839 |
| 0.330489303     | 0.307477515   | 0.211917705 | 0.101029027 | 0.750159102 |
| 0.203600598     | 0.241866549   | 0.264344111 | 0.076473291 | 0.62571274  |
| 0.406530556     | 0.346304236   | 0.205246327 | 0.082705378 | 0.769486292 |
| 0.26618348      | 0.233649634   | 0.189398983 | 0.108487784 | 0.623228214 |
| 0.292254616     | 0.311985697   | 0.198813738 | 0.082928105 | 0.488176416 |
| 0.10374178      | 0.225433498   | 0.284896143 | 0.081885717 | 1.095050937 |
| 0.294174328     | 0.332600777   | 0.262043121 | 0.077742368 | 0.677183918 |
| 0.352979691     | 0.245893341   | 0.171640703 | 0.163533446 | 0.321464637 |
| 0.319456178     | 0.190577381   | 0.205046498 | 0.139939886 | 0.443986882 |
| 0.29342374      | 0.264957881   | 0.242018224 | 0.081846648 | 0.51729071  |
| 0.314954354     | 0.285770134   | 0.189551601 | 0.11809304  | 0.539442936 |
| 0.384276788     | 0.243830437   | 0.155913862 | 0.214901672 | 0.386575737 |

Table S2. RPPA Protein expression data of 15 Primary Tumors

Brown et al.

| Bcl-2-M-V   | Bcl-xL-R-V  | Beclin-G-C  | beta-Catenin-R-V |
|-------------|-------------|-------------|------------------|
| 0.063420669 | 0.687143191 | 0.105671322 | 0.99921853       |
| 0.025990315 | 0.62719382  | 0.061264068 | 1.265470723      |
| 0.059328012 | 0.480541709 | 0.116435044 | 0.861336078      |
| 0.044329088 | 0.552755452 | 0.118583025 | 0.936678366      |
| 0.034728944 | 0.615603822 | 0.072583718 | 1.125321071      |
| 0.070535461 | 0.75155567  | 0.039229653 | 1.786334441      |
| 0.062751841 | 0.674962893 | 0.111037783 | 0.94733698       |
| 0.047664085 | 0.454095857 | 0.107729812 | 1.065465614      |
| 0.046632049 | 0.767290605 | 0.100648123 | 0.733729518      |
| 0.045552293 | 0.567845529 | 0.088684978 | 0.858696913      |
| 0.05918114  | 0.347159634 | 0.128347521 | 1.095972083      |
| 0.058749451 | 0.376608313 | 0.116343692 | 0.542289791      |
| 0.045803305 | 0.322835986 | 0.051139963 | 0.471614816      |
| 0.065643998 | 0.39792023  | 0.124236899 | 0.832206131      |
| 0.04399423  | 0.500138171 | 0.111320545 | 0.724347534      |

Table S2. RPPA Protein expression data of 15 Primary Tumors

Brown et al.

| beta-Catenin_pT41_S45-R-V | Bid-R-C     | Bim-R-V     | BRCA2-R-C   |
|---------------------------|-------------|-------------|-------------|
| 0.096312287               | 0.334928759 | 0.194480342 | 0.14115082  |
| 0.04963933                | 0.546464103 | 0.211615896 | 0.17552298  |
| 0.106121317               | 0.298534396 | 0.268740402 | 0.096649104 |
| 0.095896007               | 0.34186876  | 0.132066881 | 0.123528404 |
| 0.126748672               | 0.530710293 | 0.175067319 | 0.183968884 |
| 0.073022024               | 0.297060469 | 0.176314723 | 0.110992201 |
| 0.090170392               | 0.342342855 | 0.175608014 | 0.14318568  |
| 0.113744912               | 0.342258382 | 0.148066586 | 0.123996106 |
| 0.119747318               | 0.486834119 | 0.15513244  | 0.154851263 |
| 0.098254555               | 0.497878236 | 0.205140717 | 0.179641654 |
| 0.10102489                | 0.279251852 | 0.204985842 | 0.118433055 |
| 0.091361236               | 0.365802145 | 0.20449134  | 0.144178213 |
| 0.071705329               | 0.389616715 | 0.156314704 | 0.124953635 |
| 0.099122427               | 0.313136583 | 0.255555175 | 0.116923375 |
| 0.082320723               | 0.240563532 | 0.151366729 | 0.099114534 |



Table S2. RPPA Protein expression data of 15 Primary Tumors

Brown et al.

| c-Jun_pS73-R-V | c-Kit-R-V   | c-Met_pY1235-R-V | c-Myc-R-C   | C-Raf-R-V   |
|----------------|-------------|------------------|-------------|-------------|
| 0.141635018    | 0.203644562 | 0.280173091      | 0.403844915 | 0.488037866 |
| 0.232658959    | 0.323256953 | 0.304038415      | 1.663672803 | 0.275379188 |
| 0.127384954    | 0.216009811 | 0.274084914      | 0.433872163 | 0.575440613 |
| 0.167051505    | 0.21381213  | 0.342712349      | 0.579989878 | 0.374229702 |
| 0.170583245    | 0.272221464 | 0.403394102      | 0.569517307 | 0.404700795 |
| 0.13027141     | 0.211043412 | 0.246289201      | 0.306583146 | 0.385544022 |
| 0.120476777    | 0.209289061 | 0.274428327      | 0.368386167 | 0.458013058 |
| 0.289222595    | 0.181112282 | 0.279113978      | 0.610063767 | 0.360004004 |
| 0.245024341    | 0.257400449 | 0.412925156      | 1.554924693 | 0.343142007 |
| 0.180509469    | 0.279851109 | 0.36279669       | 0.770075293 | 0.397929734 |
| 0.174336241    | 0.253198865 | 0.260124362      | 0.731494634 | 0.803769988 |
| 0.133982761    | 0.309968265 | 0.299328236      | 0.495432884 | 0.459208931 |
| 0.160720494    | 0.249470885 | 0.291137063      | 0.366082855 | 0.508599698 |
| 0.137883899    | 0.211638044 | 0.289801884      | 0.406548608 | 0.615932049 |
| 0.121008133    | 0.172430693 | 0.236881784      | 0.317318815 | 0.702338519 |

Table S2. RPPA Protein expression data of 15 Primary Tumors

Brown et al.

| C-Raf_pS338-R-V | Caspase-7_cleavedD198-R-C | Caveolin-1-R-V | CD29-M-V    |
|-----------------|---------------------------|----------------|-------------|
| 0.394188619     | 0.107352351               | 0.104222048    | 0.071936541 |
| 0.450560717     | 0.139454714               | 0.605192004    | 0.077150418 |
| 0.458446798     | 0.078300019               | 0.097196329    | 0.060604356 |
| 0.459532292     | 0.108253165               | 0.08917841     | 0.060159659 |
| 0.560292263     | 0.147313071               | 0.241123738    | 0.079426186 |
| 0.388011499     | 0.078803524               | 0.085860057    | 0.047574527 |
| 0.373309896     | 0.092375648               | 0.085909081    | 0.07114394  |
| 0.456575306     | 0.19497889                | 0.540126781    | 0.067596273 |
| 0.578608721     | 0.1718457                 | 4.523334775    | 0.09822067  |
| 0.530731625     | 0.127722325               | 0.292349232    | 0.066042418 |
| 0.426184925     | 0.078429621               | 0.137920908    | 0.064676614 |
| 0.400279056     | 0.092194081               | 0.085399904    | 0.056112701 |
| 0.497014578     | 0.108392585               | 0.109441577    | 0.064447087 |
| 0.493516002     | 0.087029297               | 0.091844389    | 0.072892169 |
| 0.385197005     | 0.071233871               | 0.119171211    | 0.052357547 |

Table S2. RPPA Protein expression data of 15 Primary Tumors

Brown et al.

| CD31-M-V    | CD49b-M-V   | CDK1-R-V    | CDKN2A_p16INK4a-R-V | Chk1-M-C    |
|-------------|-------------|-------------|---------------------|-------------|
| 0.065771885 | 0.042214448 | 0.221720425 | 0.065719197         | 0.193345893 |
| 0.036221845 | 0.029945368 | 0.117929873 | 0.397702029         | 0.187602183 |
| 0.052877957 | 0.040548716 | 0.271899016 | 0.075007974         | 0.265014435 |
| 0.05943109  | 0.044308111 | 0.181135681 | 0.086735071         | 0.109945306 |
| 0.086237064 | 0.041299372 | 0.204345966 | 0.119093552         | 0.107100949 |
| 0.028321627 | 0.016192218 | 0.4179867   | 0.075527356         | 0.182740454 |
| 0.063163762 | 0.041193796 | 0.207396619 | 0.064281415         | 0.157911229 |
| 0.047894084 | 0.030337483 | 0.188583081 | 0.399204593         | 0.1790222   |
| 0.072858307 | 0.04064365  | 0.279088054 | 0.114600529         | 0.128001286 |
| 0.057431471 | 0.036556393 | 0.218432828 | 0.082738469         | 0.120095317 |
| 0.052430079 | 0.036808417 | 0.252548512 | 0.065959527         | 0.27411056  |
| 0.056056701 | 0.032892803 | 0.211026083 | 0.394826001         | 0.325147979 |
| 0.04659994  | 0.03538095  | 0.203632209 | 0.276964896         | 0.299951156 |
| 0.061509259 | 0.045091184 | 0.259485188 | 0.069873856         | 0.283536693 |
| 0.044118933 | 0.030907457 | 0.182743132 | 0.072529719         | 0.402786811 |

Table S2. RPPA Protein expression data of 15 Primary Tumors

Brown et al.

| Chk1_pS345-R-C | Chk2-M-V    | Chk2_pT68-R-C | cIAP-R-C    | Claudin-7-R-V |
|----------------|-------------|---------------|-------------|---------------|
| 0.159212344    | 0.234654025 | 0.097131247   | 0.460047646 | 0.112669073   |
| 0.118852387    | 0.181764547 | 0.136449385   | 0.384855136 | 0.230133563   |
| 0.177605453    | 0.205442862 | 0.097537728   | 0.609905017 | 0.122508867   |
| 0.167935954    | 0.215973275 | 0.105026059   | 0.674418759 | 0.124640807   |
| 0.163178826    | 0.154206063 | 0.138578998   | 0.411026039 | 0.156784253   |
| 0.147727936    | 0.171097709 | 0.107528428   | 0.523296588 | 0.107346066   |
| 0.150140053    | 0.228363675 | 0.097078067   | 0.466461259 | 0.109580959   |
| 0.165702735    | 0.187222692 | 0.097690132   | 0.452268974 | 0.126664729   |
| 0.112468251    | 0.104288521 | 0.125199897   | 0.46293323  | 0.177079191   |
| 0.141920216    | 0.194917946 | 0.144880297   | 0.495094991 | 0.142099372   |
| 0.171095465    | 0.189191277 | 0.110400397   | 0.587230938 | 0.100686541   |
| 0.149232749    | 0.162702147 | 0.116359367   | 0.521611472 | 0.111027445   |
| 0.166877549    | 0.250166392 | 0.162670329   | 0.392095974 | 0.144674233   |
| 0.137701153    | 0.19257705  | 0.097161429   | 0.629493891 | 0.106988202   |
| 0.17166528     | 0.248039521 | 0.077162274   | 0.844969218 | 0.094741177   |

Table S2. RPPA Protein expression data of 15 Primary Tumors

Brown et al.

| Collagen_VI-R-V | Complex_II_Subunit 30-M-V | Cox 2-R-C   | Cox_IV-M-C  |
|-----------------|---------------------------|-------------|-------------|
| 0.632127367     | 0.831160582               | 0.05250951  | 0.132154607 |
| 1.336801978     | 1.305574189               | 0.090112835 | 0.112906053 |
| 0.601895754     | 0.846242397               | 0.064623185 | 0.128973489 |
| 0.501039892     | 0.522288177               | 0.068109292 | 0.143859288 |
| 1.015490599     | 1.326393584               | 0.094586474 | 0.155373802 |
| 0.7514122       | 0.986169774               | 0.056899201 | 0.112354591 |
| 0.636946619     | 0.778559961               | 0.049137426 | 0.128630982 |
| 0.874562536     | 1.108756119               | 0.084532766 | 0.146313052 |
| 0.909178149     | 1.444201392               | 0.117853035 | 0.164781973 |
| 0.906005781     | 1.385987189               | 0.405611063 | 0.143348779 |
| 0.512165504     | 0.900349595               | 0.105499655 | 0.114523344 |
| 0.715339946     | 1.265799811               | 0.084286932 | 0.143095755 |
| 0.811043446     | 0.946544885               | 0.166879618 | 0.11954611  |
| 0.57521323      | 0.889546463               | 0.076701077 | 0.134275978 |
| 0.393097268     | 0.760036769               | 0.070910453 | 0.098521106 |

Table S2. RPPA Protein expression data of 15 Primary Tumors

Brown et al.

| CRM1-R-E    | Cyclin_B1-R-V | Cyclin_D1-R-V | Cyclin_E1-M-V | Cyclophilin_F-M-V |
|-------------|---------------|---------------|---------------|-------------------|
| 1.102340125 | 0.125519449   | 0.501181225   | 0.220695435   | 1.355463907       |
| 1.180914008 | 0.239222882   | 1.126446409   | 0.20379335    | 1.336769122       |
| 0.960675622 | 0.163489716   | 0.503850922   | 0.194629501   | 1.984884426       |
| 0.967929546 | 0.103373825   | 0.414112254   | 0.268320604   | 1.207591583       |
| 0.560335316 | 0.116699091   | 0.828113708   | 0.147879503   | 0.796142046       |
| 0.40409344  | 0.134395427   | 0.608606464   | 0.154336879   | 1.327030802       |
| 0.996834627 | 0.134991574   | 0.535299451   | 0.211265429   | 1.519002397       |
| 0.845346918 | 0.259048141   | 0.63876885    | 0.282341619   | 1.177563071       |
| 1.173654043 | 0.139472469   | 0.777475351   | 0.216844732   | 0.353343401       |
| 0.702571088 | 0.12663884    | 0.716086      | 0.124926199   | 1.064256469       |
| 1.79502929  | 0.205874806   | 0.422487164   | 0.149715661   | 1.617014327       |
| 1.556310146 | 0.287999954   | 0.574582824   | 0.28708458    | 1.299648629       |
| 0.572812908 | 0.316872084   | 0.673880826   | 0.267489792   | 1.114979802       |
| 1.023562148 | 0.171294534   | 0.470561882   | 0.192085633   | 2.23833514        |
| 1.342311663 | 0.343248497   | 0.31724418    | 0.244710026   | 1.411266489       |

Table S2. RPPA Protein expression data of 15 Primary Tumors

Brown et al.

| DJ-1-R-V    | Dvl3-R-V    | E-Cadherin-R-V | E2F1-M-V    | eEF2-R-C    |
|-------------|-------------|----------------|-------------|-------------|
| 0.611258608 | 0.185557798 | 0.037202071    | 0.06722251  | 0.540892869 |
| 0.914730586 | 0.122201512 | 0.071822759    | 0.054641081 | 0.344886673 |
| 0.646063992 | 0.311473393 | 0.032666237    | 0.057824598 | 0.498768634 |
| 0.870581668 | 0.251466173 | 0.02268762     | 0.068445596 | 0.43637709  |
| 0.629422569 | 0.156321464 | 0.044036488    | 0.064908152 | 0.319811214 |
| 1.095422793 | 0.202199055 | 0.061848982    | 0.057515992 | 0.579401753 |
| 0.620455765 | 0.17793668  | 0.038932535    | 0.069920543 | 0.687953314 |
| 0.702983051 | 0.157159541 | 0.031786308    | 0.044732359 | 0.456050258 |
| 1.223081819 | 0.088314128 | 0.04900479     | 0.057402953 | 0.372064183 |
| 0.583832872 | 0.12953329  | 0.035795316    | 0.072088873 | 0.310077121 |
| 0.596571299 | 0.434969061 | 0.07458444     | 0.057792093 | 0.45991373  |
| 0.803382493 | 0.432129067 | 0.025759102    | 0.070317122 | 0.381873378 |
| 0.742226603 | 0.315822508 | 0.039336818    | 0.100200696 | 0.512935411 |
| 0.727073929 | 0.28801114  | 0.030646488    | 0.0666636   | 0.430186099 |
| 0.790106309 | 0.373614605 | 0.033419409    | 0.057573365 | 0.466499726 |

Table S2. RPPA Protein expression data of 15 Primary Tumors

Brown et al.

| eEF2K-R-V   | EGFR-R-V    | EGFR_pY1068-R-C | EGFR_pY1173-R-V | eIF4E-R-V   |
|-------------|-------------|-----------------|-----------------|-------------|
| 0.257783045 | 2.768145474 | 3.085647695     | 2.179906541     | 0.39235514  |
| 0.151419732 | 0.62642907  | 1.208457246     | 1.051447633     | 0.183578613 |
| 0.189710571 | 0.535142498 | 0.304830571     | 0.466963872     | 0.362136188 |
| 0.200398245 | 0.282004678 | 0.054340448     | 0.453092714     | 0.355738779 |
| 0.099008277 | 1.478190335 | 1.752424159     | 1.333465289     | 0.286123824 |
| 0.168053039 | 1.775982293 | 18.37605653     | 7.964019655     | 0.489442573 |
| 0.257048634 | 3.295006425 | 3.343879991     | 2.252928079     | 0.393674493 |
| 0.144588032 | 0.339458684 | 0.276513199     | 0.484064325     | 0.211413523 |
| 0.122058461 | 0.283306285 | 0.272792852     | 0.620201475     | 0.119312713 |
| 0.092878752 | 0.316806268 | 0.146498703     | 0.537100586     | 0.201613858 |
| 0.274877175 | 0.485660671 | 0.352407598     | 0.431478718     | 0.300742593 |
| 0.229672225 | 0.909222107 | 0.351077296     | 0.540996414     | 0.376962935 |
| 0.220306616 | 0.185531362 | 0.096729668     | 0.41114072      | 0.287974569 |
| 0.185785648 | 0.549957669 | 0.307008722     | 0.465148102     | 0.355961044 |
| 0.310295001 | 0.379098741 | 0.088761316     | 0.28336328      | 0.366921852 |



Table S2. RPPA Protein expression data of 15 Primary Tumors

Brown et al.

| eIF4G-R-C   | ER-alpha-R-V | ER-alpha_pS118-R-V | ETS-1-R-V   | FAK -R-E    |
|-------------|--------------|--------------------|-------------|-------------|
| 0.180403406 | 0.059232145  | 0.233709548        | 0.196364424 | 0.387521478 |
| 0.147950209 | 0.061157309  | 0.195339996        | 0.164466824 | 0.275075701 |
| 0.591152347 | 0.049515072  | 0.241881685        | 0.171271878 | 0.515283241 |
| 0.445260879 | 0.050670262  | 0.26263296         | 0.134292931 | 0.536342814 |
| 0.127375005 | 0.058096575  | 0.271984212        | 0.23078381  | 0.360353327 |
| 0.16785877  | 0.036594392  | 0.27554801         | 0.135404453 | 0.598561238 |
| 0.167033799 | 0.059109512  | 0.211683523        | 0.23359049  | 0.383670472 |
| 0.249658031 | 0.050273694  | 0.190501937        | 0.180043049 | 0.392641883 |
| 0.109873938 | 0.057450206  | 0.251044457        | 0.157037407 | 0.472422039 |
| 0.111370128 | 0.070385688  | 0.247938786        | 0.160046791 | 0.420464071 |
| 0.533442465 | 0.049855772  | 0.190230268        | 0.129525803 | 0.624299769 |
| 0.573821466 | 0.062173814  | 0.262261287        | 0.146486377 | 0.542505492 |
| 0.159650763 | 0.058736863  | 0.182671818        | 0.135409559 | 0.486227392 |
| 0.595461708 | 0.053190159  | 0.237447193        | 0.116530079 | 0.521884784 |
| 0.860513691 | 0.040632708  | 0.227670069        | 0.122711511 | 0.988727715 |

Table S2. RPPA Protein expression data of 15 Primary Tumors

Brown et al.

| FAK_pY397-R-V | FASN-R-V    | Fibronectin-R-V | FoxM1-R-V   | FOXO3a-R-C  |
|---------------|-------------|-----------------|-------------|-------------|
| 0.044481969   | 0.085153697 | 0.032414623     | 0.053427392 | 0.03112847  |
| 0.040239968   | 0.057436732 | 0.091782002     | 0.10834097  | 0.038853328 |
| 0.045436161   | 0.066236181 | 0.04849988      | 0.056308681 | 0.03200837  |
| 0.03050497    | 0.113030884 | 0.053421605     | 0.04706216  | 0.031575414 |
| 0.039473483   | 0.039229226 | 0.072117734     | 0.061851203 | 0.031751486 |
| 0.069137047   | 0.051497904 | 0.032123621     | 0.053079331 | 0.039603263 |
| 0.042701387   | 0.085026954 | 0.030898005     | 0.055439715 | 0.03143692  |
| 0.045997744   | 0.030631734 | 0.045417295     | 0.039097507 | 0.032298308 |
| 0.03996971    | 0.039189179 | 0.077881276     | 0.073921227 | 0.032816545 |
| 0.06771877    | 0.043304628 | 0.064511528     | 0.059071315 | 0.032140886 |
| 0.079430801   | 0.061028365 | 0.034918723     | 0.066192909 | 0.030664821 |
| 0.051110881   | 0.064196265 | 0.044755682     | 0.049925403 | 0.035009124 |
| 0.072515301   | 0.064093091 | 0.039392717     | 0.058371496 | 0.032565845 |
| 0.042149492   | 0.069110517 | 0.056758389     | 0.049991847 | 0.032439581 |
| 0.037887404   | 0.069746379 | 0.030031969     | 0.102034278 | 0.02881219  |

Table S2. RPPA Protein expression data of 15 Primary Tumors

Brown et al.

| FOXO3a_pS318_S321-R-C | G6PD-M-V    | Gab2-R-V    | GAPDH-M-C   | GATA3-M-V   |
|-----------------------|-------------|-------------|-------------|-------------|
| 0.07607672            | 0.214033421 | 0.503101589 | 0.448587848 | 0.060572504 |
| 0.067029502           | 0.157156723 | 0.388011043 | 1.312419298 | 0.053498418 |
| 0.071317802           | 0.16043843  | 0.972924841 | 0.582217172 | 0.036839314 |
| 0.076481122           | 0.244776517 | 0.850775019 | 0.668721652 | 0.039426907 |
| 0.068714396           | 0.18518568  | 0.326184017 | 0.652541174 | 0.034181279 |
| 0.088996674           | 0.185137651 | 1.016705022 | 1.209283967 | 0.047576308 |
| 0.070779813           | 0.218683074 | 0.488325875 | 0.470677918 | 0.044186457 |
| 0.071525654           | 0.237152    | 0.240225885 | 1.043985579 | 0.043729213 |
| 0.04844666            | 0.204406359 | 0.137604354 | 0.476601275 | 0.044432585 |
| 0.062210587           | 0.18363533  | 0.361525603 | 0.617717209 | 0.038776062 |
| 0.060672059           | 0.136065019 | 0.721887099 | 0.340788598 | 0.043994204 |
| 0.061999389           | 0.173875857 | 0.595763083 | 0.26839348  | 0.044477671 |
| 0.07554323            | 0.175458724 | 0.502277184 | 0.509397723 | 0.05196294  |
| 0.073266172           | 0.137645493 | 0.952750661 | 0.333174265 | 0.042768666 |
| 0.08587461            | 0.159523627 | 1.179295945 | 0.689058605 | 0.053631989 |

| GCN5L2-R-V  | GPBB-R-V    | GSK3-alpha-beta-M-V | GSK3-alpha-beta_pS21_S9-R-V |
|-------------|-------------|---------------------|-----------------------------|
| 0.037717541 | 1.139621153 | 0.953474869         | 0.330978004                 |
| 0.078443796 | 0.325163329 | 0.738886677         | 0.779354382                 |
| 0.034038257 | 0.541105535 | 1.323578431         | 1.113040807                 |
| 0.036156743 | 0.823740744 | 1.098280893         | 0.391205697                 |
| 0.044783088 | 0.624993883 | 0.785186802         | 0.377669137                 |
| 0.038431853 | 0.384302813 | 1.270001189         | 1.487251715                 |
| 0.033712491 | 1.216562093 | 0.93615114          | 0.331062356                 |
| 0.028133725 | 0.532363591 | 0.530473069         | 0.705580603                 |
| 0.053522334 | 0.633741407 | 0.562793594         | 0.33431583                  |
| 0.039095135 | 0.406086773 | 0.86651337          | 0.596413667                 |
| 0.044216994 | 0.384982206 | 1.22074172          | 1.010271979                 |
| 0.039416232 | 0.683545734 | 1.192164768         | 0.418633555                 |
| 0.038960276 | 0.172961731 | 0.948774697         | 0.782887237                 |
| 0.048263751 | 0.517408078 | 1.27689034          | 1.076268156                 |
| 0.060233881 | 0.646887214 | 1.235814355         | 0.675199877                 |

Table S2. RPPA Protein expression data of 15 Primary Tumors

Brown et al.

| GSK3_pS9-R-V | GYS-R-V     | GYS_pS641-R-V | HER2-M-V    | HER2_pY1248-R-C |
|--------------|-------------|---------------|-------------|-----------------|
| 0.090686754  | 1.285282916 | 0.193448987   | 0.417814023 | 0.555209667     |
| 0.64592058   | 1.007184546 | 0.262426194   | 0.267478395 | 0.298394556     |
| 0.913103269  | 1.233572447 | 0.2075021     | 0.342837407 | 0.065936221     |
| 0.099706814  | 2.052920089 | 0.304058307   | 0.292900992 | 0.029606584     |
| 0.17860807   | 1.306072257 | 0.209337093   | 0.579344246 | 0.403450245     |
| 1.171521319  | 0.46566545  | 0.109483697   | 0.437431423 | 4.891295283     |
| 0.098281959  | 1.291233383 | 0.199647318   | 0.582118046 | 0.54115746      |
| 0.551951092  | 1.015907362 | 0.239558384   | 0.451923998 | 0.072891131     |
| 0.219080236  | 1.966348452 | 0.330555557   | 0.295373587 | 0.081155519     |
| 0.447382915  | 0.854156361 | 0.192595276   | 0.23767895  | 0.045577086     |
| 1.005211063  | 1.059981893 | 0.192707066   | 0.202211461 | 0.088176628     |
| 0.282889788  | 0.828938129 | 0.088651346   | 0.175347482 | 0.08365158      |
| 0.681669397  | 0.374477274 | 0.083726878   | 0.345504681 | 0.043263673     |
| 0.784973333  | 1.536626199 | 0.236332131   | 0.266499739 | 0.068961365     |
| 0.434614028  | 1.093080255 | 0.185674463   | 0.333045497 | 0.028744785     |

Table S2. RPPA Protein expression data of 15 Primary Tumors

Brown et al.

| HER3-R-V    | HER3_pY1289-R-C | Heregulin-R-V | Histone H3-R-V | IGF1R-R-V   |
|-------------|-----------------|---------------|----------------|-------------|
| 0.303317979 | 0.311978273     | 0.062418202   | 0.184225657    | 0.26279259  |
| 0.185044592 | 0.264909455     | 0.065987758   | 0.14027075     | 0.159947031 |
| 0.518181206 | 0.368074278     | 0.057744679   | 0.1614516      | 0.252429162 |
| 0.265408189 | 0.332847436     | 0.057848125   | 0.108706893    | 0.150755322 |
| 0.311428177 | 0.416188018     | 0.05185368    | 0.413310358    | 0.313191265 |
| 0.242091014 | 0.298115747     | 0.0456403     | 0.087924251    | 0.149667777 |
| 0.318834017 | 0.309166627     | 0.052637152   | 0.183066001    | 0.247545085 |
| 0.220979891 | 0.299716375     | 0.052248913   | 0.099955275    | 0.150711929 |
| 0.271948864 | 0.419406686     | 0.049286815   | 0.168787436    | 0.109132129 |
| 0.273494576 | 0.392044533     | 0.061882109   | 0.092095698    | 0.155719846 |
| 0.678206795 | 0.380633049     | 0.065134384   | 0.15939271     | 0.279059275 |
| 0.548569425 | 0.333284103     | 0.065297332   | 0.161088563    | 0.233968443 |
| 0.612794214 | 0.31721802      | 0.045658591   | 0.157770001    | 0.155838457 |
| 0.569044    | 0.378195206     | 0.060744726   | 0.121464323    | 0.229909568 |
| 0.257929282 | 0.313646795     | 0.061951374   | 0.135465826    | 0.255508317 |

Table S2. RPPA Protein expression data of 15 Primary Tumors

Brown et al.

| IGFBP2-R-V  | INPP4B-R-V  | IRS1-R-V    | JNK_pT183_Y185-R-V | JNK2-R-C    |
|-------------|-------------|-------------|--------------------|-------------|
| 1.320587114 | 0.061524336 | 0.263697113 | 0.100375208        | 0.259602824 |
| 4.914764206 | 0.039025647 | 0.265102829 | 0.157615292        | 0.087178958 |
| 2.908774046 | 0.045901843 | 0.245428142 | 0.102601023        | 0.241096539 |
| 0.564062043 | 0.046543555 | 0.275812332 | 0.113856336        | 0.277428293 |
| 2.486093331 | 0.047748512 | 0.32163854  | 0.162745818        | 0.18880312  |
| 4.305646654 | 0.024200254 | 0.210599794 | 0.157777159        | 0.312449453 |
| 1.312006924 | 0.054159727 | 0.277694165 | 0.097422938        | 0.252116792 |
| 3.401369581 | 0.032570011 | 0.278612125 | 0.212428731        | 0.205388245 |
| 2.647538516 | 0.050626629 | 0.336897827 | 0.111049001        | 0.102590693 |
| 1.00551951  | 0.036812252 | 0.313548785 | 0.152380243        | 0.163074969 |
| 2.647710537 | 0.044341601 | 0.225654167 | 0.102477511        | 0.196457894 |
| 1.395751764 | 0.048739259 | 0.262559124 | 0.095136525        | 0.205619502 |
| 7.717722387 | 0.02869463  | 0.230759308 | 0.121815699        | 0.244425918 |
| 2.976910833 | 0.04996762  | 0.252268067 | 0.100376556        | 0.173716949 |
| 2.960070735 | 0.049403315 | 0.188778484 | 0.070848495        | 0.177596301 |

Table S2. RPPA Protein expression data of 15 Primary Tumors

Brown et al.

| Lck-R-V     | MAPK_pT202_Y204-R-V | Mcl-1-R-V   | MDM2_pS166-R-V |
|-------------|---------------------|-------------|----------------|
| 0.17319807  | 0.170759593         | 0.034681662 | 0.036830782    |
| 0.227042891 | 0.586907669         | 0.02737608  | 0.043582003    |
| 0.171293587 | 0.270360139         | 0.025675554 | 0.059865444    |
| 0.201373268 | 0.365099081         | 0.030018873 | 0.027293154    |
| 0.263518022 | 0.217684738         | 0.014646364 | 0.027500202    |
| 0.194484875 | 0.655909501         | 0.035292866 | 0.035067383    |
| 0.187641813 | 0.175963965         | 0.033537816 | 0.037321044    |
| 0.165565686 | 0.829532007         | 0.023050687 | 0.046999839    |
| 0.275981617 | 0.291413532         | 0.022431676 | 0.029736074    |
| 0.229369876 | 0.573236684         | 0.018334482 | 0.029010831    |
| 0.103247463 | 0.289507527         | 0.02338715  | 0.077846379    |
| 0.151385107 | 0.083950441         | 0.024227738 | 0.037139428    |
| 0.205147303 | 0.265074898         | 0.025715979 | 0.045150928    |
| 0.125975041 | 0.293670662         | 0.026708087 | 0.060365438    |
| 0.098335671 | 0.258790662         | 0.02621659  | 0.0568889      |



Table S2. RPPA Protein expression data of 15 Primary Tumors

Brown et al.

| MEK1-R-V    | MEK1_pS217_S221-R-V | MEK2-R-V    | MIG-6-M-V   | MSH2-M-V    |
|-------------|---------------------|-------------|-------------|-------------|
| 0.124741798 | 0.048607436         | 0.178629237 | 0.335248548 | 0.188411212 |
| 0.06372017  | 0.054233178         | 0.074982504 | 0.320554116 | 0.133704546 |
| 0.108184332 | 0.048618671         | 0.145575831 | 0.346145389 | 0.167868576 |
| 0.0647615   | 0.050341422         | 0.194834249 | 0.371889452 | 0.151129424 |
| 0.172372633 | 0.063150011         | 0.131460954 | 0.36390964  | 0.084572351 |
| 0.184124098 | 0.056306265         | 0.19190382  | 0.290721563 | 0.138298472 |
| 0.128287281 | 0.049616418         | 0.184332983 | 0.349312669 | 0.173476374 |
| 0.074652875 | 0.081691618         | 0.136299546 | 0.43525427  | 0.108247185 |
| 0.0362199   | 0.049277696         | 0.206161791 | 0.426545469 | 0.091226837 |
| 0.111934917 | 0.073460547         | 0.168043331 | 0.40281648  | 0.096318673 |
| 0.103024253 | 0.05314974          | 0.129400666 | 0.28875804  | 0.214473058 |
| 0.150078813 | 0.063648947         | 0.150674796 | 0.330820361 | 0.277745985 |
| 0.117580445 | 0.067021074         | 0.112398093 | 0.306053771 | 0.237003199 |
| 0.11339609  | 0.053945567         | 0.148588117 | 0.330896395 | 0.204026848 |
| 0.121062775 | 0.051558137         | 0.136429816 | 0.331543189 | 0.293038063 |

Table S2. RPPA Protein expression data of 15 Primary Tumors

Brown et al.

| MSH6-R-C    | mTOR-R-V    | mTOR_pS2448-R-C | MYH11-R-V   |
|-------------|-------------|-----------------|-------------|
| 0.064540277 | 0.142111812 | 0.012932013     | 0.015981372 |
| 0.067451447 | 0.09197975  | 0.015996607     | 0.030348914 |
| 0.113016977 | 0.231133822 | 0.02166071      | 0.018326831 |
| 0.040039216 | 0.056203762 | 0.014175297     | 0.024854377 |
| 0.038507622 | 0.098200142 | 0.016926777     | 0.030866551 |
| 0.064311526 | 0.045063502 | 0.007837194     | 0.014812175 |
| 0.059973136 | 0.128809958 | 0.012208399     | 0.016042798 |
| 0.045884645 | 0.112510408 | 0.021557647     | 0.107205167 |
| 0.046022236 | 0.062757938 | 0.010914512     | 0.01968823  |
| 0.033616724 | 0.074418972 | 0.014750263     | 0.034989188 |
| 0.125921941 | 0.304093951 | 0.026426624     | 0.024904815 |
| 0.163003762 | 0.260204451 | 0.00940385      | 0.041984236 |
| 0.109876872 | 0.045683109 | 0.007944952     | 0.041146133 |
| 0.098383622 | 0.203130381 | 0.021984686     | 0.021005358 |
| 0.162788871 | 0.299934229 | 0.020608042     | 0.05590175  |

Table S2. RPPA Protein expression data of 15 Primary Tumors

Brown et al.

| Myosin IIa pS1943-R-V | N-Cadherin-R-V | N-Ras-M-V   | Napsin-R-C  |
|-----------------------|----------------|-------------|-------------|
| 0.073305007           | 0.086398582    | 0.034039032 | 0.055104136 |
| 0.104535792           | 0.142748183    | 0.016226872 | 0.049045674 |
| 0.031894327           | 0.05951282     | 0.03333486  | 0.04926371  |
| 0.068171234           | 0.056460007    | 0.036897226 | 0.055737451 |
| 0.05967885            | 0.10406857     | 0.028005826 | 0.05932946  |
| 0.051215065           | 0.099756613    | 0.013198701 | 0.038610432 |
| 0.066046023           | 0.077753008    | 0.034318329 | 0.05552999  |
| 0.172034502           | 0.081878754    | 0.035961801 | 0.04672312  |
| 0.071324947           | 0.099220859    | 0.043857545 | 0.058807872 |
| 0.063428171           | 0.084169382    | 0.035671425 | 0.060019193 |
| 0.030388864           | 0.080594279    | 0.032788265 | 0.047899154 |
| 0.037491572           | 0.060032645    | 0.037404553 | 0.06070542  |
| 0.051919254           | 0.066172326    | 0.024489686 | 0.044028215 |
| 0.035652965           | 0.064180783    | 0.033345024 | 0.048899631 |
| 0.050993746           | 0.05278773     | 0.027889611 | 0.039069982 |

Table S2. RPPA Protein expression data of 15 Primary Tumors

Brown et al.

| NDRG1_pT346-R-V | NF-kB-p65_pS536-R-C | NF2-R-C     | Notch1-R-V  | p21-R-V     |
|-----------------|---------------------|-------------|-------------|-------------|
| 0.347953079     | 0.072666654         | 0.566320856 | 0.164216444 | 0.084703485 |
| 1.219253299     | 0.110462089         | 0.28907373  | 0.093853411 | 0.152924077 |
| 0.927076607     | 0.099392846         | 0.833876115 | 0.249294242 | 0.115573405 |
| 0.318582868     | 0.062437321         | 0.958599238 | 0.164698281 | 0.072685454 |
| 0.72962039      | 0.094066846         | 0.350167756 | 0.13271329  | 0.094159158 |
| 0.58732976      | 0.074725447         | 0.565339358 | 0.155456804 | 0.091488823 |
| 0.34436193      | 0.065445939         | 0.589235133 | 0.149649114 | 0.072829712 |
| 0.54844445      | 0.093937939         | 0.594555398 | 0.109183721 | 0.183049508 |
| 0.298959735     | 0.07536847          | 0.341488517 | 0.119963366 | 0.071436766 |
| 0.468296009     | 0.057789589         | 0.485145265 | 0.121360527 | 0.174664586 |
| 1.202603539     | 0.19829955          | 0.614751176 | 0.189283167 | 0.110280358 |
| 0.432274706     | 0.070754591         | 0.489977608 | 0.240796007 | 0.043241707 |
| 1.966151044     | 0.079331915         | 0.429317612 | 0.164398779 | 0.101003656 |
| 1.057690156     | 0.089939848         | 0.654305116 | 0.260282249 | 0.124428182 |
| 0.235059731     | 0.159807859         | 0.655306758 | 0.217871902 | 0.185645428 |

Table S2. RPPA Protein expression data of 15 Primary Tumors

Brown et al.

| p27-R-V     | p27_pT157-R-C | p27_pT198-R-V | p38 alpha MAPK-M-V | p38_MAPK-R-V |
|-------------|---------------|---------------|--------------------|--------------|
| 0.151506932 | 0.099822653   | 0.111939461   | 0.25465794         | 0.341181844  |
| 0.248864581 | 0.086435139   | 0.15279925    | 0.140386561        | 0.160925908  |
| 0.148061572 | 0.092251038   | 0.117640449   | 0.268782679        | 0.263157023  |
| 0.173246009 | 0.091677416   | 0.131774693   | 0.418890157        | 0.49192934   |
| 0.15621369  | 0.088784339   | 0.133860984   | 0.207204791        | 0.145532725  |
| 0.190043995 | 0.150768914   | 0.11379646    | 0.208128996        | 0.283479622  |
| 0.145709339 | 0.101823885   | 0.097983623   | 0.252791065        | 0.31221446   |
| 0.155261632 | 0.071581331   | 0.146169745   | 0.300991279        | 0.209199605  |
| 0.150639378 | 0.06433724    | 0.254133173   | 0.204496547        | 0.109800019  |
| 0.161916873 | 0.09026615    | 0.1551661     | 0.274379336        | 0.151881535  |
| 0.180517558 | 0.092971941   | 0.129747698   | 0.238419325        | 0.249014331  |
| 0.165484728 | 0.092072713   | 0.106969602   | 0.277106424        | 0.305535511  |
| 0.153821709 | 0.073230766   | 0.123633725   | 0.273225319        | 0.351810371  |
| 0.156580219 | 0.096206145   | 0.111334872   | 0.272918334        | 0.26768392   |
| 0.140316219 | 0.095900474   | 0.094954902   | 0.268932857        | 0.304767869  |

Table S2. RPPA Protein expression data of 15 Primary Tumors

Brown et al.

| p38_pT180_Y182-R-V | p53-R-C     | p70S6K-R-V  | p70S6K_pT389-R-V | p90RSK-R-C  |
|--------------------|-------------|-------------|------------------|-------------|
| 0.044627166        | 0.019194504 | 0.026775595 | 0.026541943      | 0.05808395  |
| 0.032298133        | 0.012856716 | 0.020090133 | 0.025852649      | 0.037270486 |
| 0.074989659        | 0.019947201 | 0.0255763   | 0.026711993      | 0.048540904 |
| 0.077187068        | 0.029099791 | 0.027858815 | 0.01629589       | 0.049020308 |
| 0.063491472        | 0.031731586 | 0.020661083 | 0.035789621      | 0.036829244 |
| 0.134249023        | 0.011431548 | 0.031554679 | 0.031029558      | 0.050541253 |
| 0.045110945        | 0.02123582  | 0.023609325 | 0.024534238      | 0.057247682 |
| 0.089724112        | 0.022445533 | 0.021986703 | 0.019375915      | 0.028082363 |
| 0.034787006        | 0.036169439 | 0.013641582 | 0.017639306      | 0.025429715 |
| 0.069885302        | 0.034887708 | 0.023992763 | 0.03227569       | 0.034377059 |
| 0.066330638        | 0.022155907 | 0.029749427 | 0.023861092      | 0.059940524 |
| 0.047815578        | 0.019280106 | 0.028322913 | 0.038169121      | 0.050683361 |
| 0.07521621         | 0.024721724 | 0.033680292 | 0.055095968      | 0.046909093 |
| 0.077613656        | 0.019457035 | 0.026635003 | 0.028099855      | 0.052394403 |
| 0.092523944        | 0.018489797 | 0.030119332 | 0.022156922      | 0.041157683 |

Table S2. RPPA Protein expression data of 15 Primary Tumors

Brown et al.

| PAI-1-M-V   | PAK4-R-E    | Paxillin-R-C | PCNA-M-C    | PDCD1L1-G-C |
|-------------|-------------|--------------|-------------|-------------|
| 1.86490433  | 0.106301483 | 0.057866304  | 0.28106685  | 0.155855054 |
| 1.91238007  | 0.069108949 | 0.107309563  | 0.213156673 | 0.057865456 |
| 0.691775213 | 0.12062065  | 0.075541975  | 0.165856226 | 0.086025078 |
| 0.808256049 | 0.114201818 | 0.181784716  | 0.241290385 | 0.137490608 |
| 1.606762719 | 0.083834952 | 0.061770408  | 0.185901613 | 0.083824781 |
| 0.486050545 | 0.056767916 | 0.158262634  | 0.244057568 | 0.099612469 |
| 1.718223492 | 0.100742069 | 0.054759439  | 0.292865776 | 0.153479061 |
| 0.912279141 | 0.116847758 | 0.10754931   | 0.32309116  | 0.141900494 |
| 2.867985318 | 0.116989738 | 0.108348584  | 0.207470373 | 0.224589294 |
| 1.305293687 | 0.082620601 | 0.066296426  | 0.145695402 | 0.102951004 |
| 0.434888618 | 0.105524898 | 0.064080961  | 0.17576134  | 0.08282063  |
| 0.582968308 | 0.124260242 | 0.051649198  | 0.190772756 | 0.098105397 |
| 0.808009353 | 0.073192762 | 0.037830922  | 0.238466172 | 0.068963568 |
| 0.781650755 | 0.134025918 | 0.069826798  | 0.163467245 | 0.092178604 |
| 0.345200128 | 0.12108907  | 0.083691193  | 0.227226537 | 0.081885782 |

Table S2. RPPA Protein expression data of 15 Primary Tumors

Brown et al.

| PDCD4-R-C   | PDGFR_beta-R-V1000182 | PDK1-R-V    | PDK1_pS241-R-V |
|-------------|-----------------------|-------------|----------------|
| 0.030508168 | 0.080322663           | 0.081017508 | 0.178364688    |
| 0.090971244 | 0.022436139           | 0.045017322 | 0.089335961    |
| 0.039124573 | 0.091594178           | 0.085229132 | 0.196917839    |
| 0.028736309 | 0.063232187           | 0.085125265 | 0.23226045     |
| 0.051934932 | 0.047713964           | 0.056306809 | 0.1339834      |
| 0.044569406 | 0.055654427           | 0.074086833 | 0.203798281    |
| 0.028084862 | 0.078164029           | 0.086060143 | 0.178857608    |
| 0.049555061 | 0.062560206           | 0.080248548 | 0.164562794    |
| 0.062069833 | 0.045829651           | 0.049998661 | 0.09816454     |
| 0.045338615 | 0.024727973           | 0.058009227 | 0.140573693    |
| 0.054871091 | 0.053696853           | 0.073878549 | 0.162043796    |
| 0.03288572  | 0.130856203           | 0.085800512 | 0.178567183    |
| 0.071051824 | 0.169145083           | 0.052326165 | 0.09148601     |
| 0.038750058 | 0.092812388           | 0.08916466  | 0.199377482    |
| 0.051488257 | 0.09333473            | 0.092431677 | 0.224992972    |



Table S2. RPPA Protein expression data of 15 Primary Tumors

Brown et al.

| PEA15-R-V   | PEA15_pS116-R-V | PI3K-p110-alpha-R-C | PI3K-p85-R-V | PKC-alpha-M-V |
|-------------|-----------------|---------------------|--------------|---------------|
| 3.061785121 | 0.934125614     | 0.080258922         | 0.315165297  | 1.293378105   |
| 2.789814196 | 1.797081959     | 0.038920398         | 0.125580799  | 0.555238597   |
| 3.886391612 | 0.795994462     | 0.06498866          | 0.247861883  | 1.030263991   |
| 5.913297043 | 0.84478193      | 0.063513543         | 0.221088503  | 0.859786788   |
| 2.351353735 | 1.27096241      | 0.068961364         | 0.200613891  | 0.685435246   |
| 6.045953188 | 1.431955044     | 0.053934225         | 0.258788533  | 1.294299096   |
| 3.196495065 | 1.634955885     | 0.076928563         | 0.324747854  | 1.303604298   |
| 2.086983271 | 1.119011198     | 0.062285685         | 0.253622227  | 0.359668274   |
| 1.481969697 | 1.152674068     | 0.026555453         | 0.113498966  | 0.231508054   |
| 1.652747189 | 1.054317529     | 0.053824304         | 0.147130849  | 0.373417977   |
| 3.13017625  | 0.738881825     | 0.078295113         | 0.322253022  | 0.624189428   |
| 4.293061654 | 0.789819887     | 0.094962175         | 0.448612702  | 0.662078149   |
| 1.02180506  | 0.853362189     | 0.072696965         | 0.244666198  | 0.389344404   |
| 3.622746761 | 0.833688285     | 0.071250123         | 0.283862359  | 0.881226634   |
| 3.682982072 | 0.570796601     | 0.070661186         | 0.333917342  | 0.629300143   |

Table S2. RPPA Protein expression data of 15 Primary Tumors

Brown et al.

| PKC-alpha_pS657-R-C | PKC-delta_pS664-R-V | PKC-pan_Betall_pS660-R-V |
|---------------------|---------------------|--------------------------|
| 0.789899584         | 0.301126461         | 0.943865092              |
| 0.414792411         | 0.115294028         | 0.517053863              |
| 0.719810438         | 0.301529181         | 0.981296859              |
| 0.601576128         | 0.267402869         | 0.688942496              |
| 0.508280068         | 0.271170456         | 0.668170313              |
| 0.781313653         | 0.370343935         | 1.576507276              |
| 0.734476104         | 0.313093564         | 0.873135221              |
| 0.275454972         | 0.178678247         | 0.588705462              |
| 0.142461746         | 0.10050769          | 0.206868806              |
| 0.297134699         | 0.171621367         | 0.55167237               |
| 0.468104579         | 0.233292078         | 0.78380851               |
| 0.497591012         | 0.254431393         | 0.714300258              |
| 0.27098168          | 0.146570343         | 0.489106689              |
| 0.693665523         | 0.302529596         | 0.874197996              |
| 0.416795062         | 0.249524741         | 0.627383772              |

Table S2. RPPA Protein expression data of 15 Primary Tumors

Brown et al.

| PMS2-R-V1000192 | Porin-M-V   | PR-R-V      | PRAS40_pT246-R-V | PREX1-R-V   |
|-----------------|-------------|-------------|------------------|-------------|
| 0.725878918     | 0.108100329 | 0.161241909 | 0.181684091      | 1.31887469  |
| 0.347784266     | 0.081343468 | 0.103794541 | 0.413590467      | 0.080585287 |
| 1.04498082      | 0.14557131  | 0.16210247  | 0.270796161      | 0.877748966 |
| 0.482350162     | 0.16923474  | 0.18915197  | 0.193559022      | 0.661125588 |
| 0.555641934     | 0.114698729 | 0.168454046 | 0.267377984      | 0.564924145 |
| 0.752427042     | 0.082256284 | 0.146101898 | 0.358880677      | 1.101100855 |
| 0.783356663     | 0.113393291 | 0.159999444 | 0.180591981      | 1.200241882 |
| 0.75871736      | 0.152671673 | 0.148143026 | 0.325896054      | 0.135829957 |
| 0.249900102     | 0.209060362 | 0.160912434 | 0.214706035      | 0.119496045 |
| 0.381999035     | 0.154407176 | 0.197899678 | 0.252558056      | 0.201728167 |
| 1.504810648     | 0.139744441 | 0.143184946 | 0.306525988      | 0.771335174 |
| 1.677357507     | 0.133658268 | 0.176550147 | 0.203101183      | 0.475346255 |
| 0.708490966     | 0.072951382 | 0.155187415 | 0.381749774      | 0.200889947 |
| 0.975150479     | 0.154247688 | 0.164915874 | 0.277130215      | 0.918799348 |
| 1.676893388     | 0.143391438 | 0.137748267 | 0.215017594      | 0.685249369 |

Table S2. RPPA Protein expression data of 15 Primary Tumors

Brown et al.

| PTEN-R-V    | Rab11-R-E   | Rab25-R-V   | Rad50-M-V   | Rad51-R-V   |
|-------------|-------------|-------------|-------------|-------------|
| 0.610123565 | 0.057634743 | 0.039504886 | 0.165780331 | 0.07981556  |
| 0.113912512 | 0.105621311 | 0.033730438 | 0.180982065 | 0.107108455 |
| 0.448619223 | 0.046807716 | 0.034730811 | 0.214632253 | 0.047536289 |
| 0.506113155 | 0.06152445  | 0.035179536 | 0.141593794 | 0.0496997   |
| 0.391489939 | 0.076827406 | 0.036633714 | 0.152977288 | 0.118668407 |
| 0.738620001 | 0.053419424 | 0.01672529  | 0.088668274 | 0.033961128 |
| 0.586722304 | 0.057635649 | 0.040656648 | 0.176568283 | 0.077291729 |
| 0.088160696 | 0.056875349 | 0.02532999  | 0.212133355 | 0.069538519 |
| 0.077722699 | 0.081680862 | 0.025952463 | 0.149144314 | 0.091684794 |
| 0.232983487 | 0.083748465 | 0.046813513 | 0.168598359 | 0.115563807 |
| 0.299232655 | 0.048285807 | 0.03157976  | 0.237500901 | 0.058363235 |
| 0.453225272 | 0.059656118 | 0.039118878 | 0.216798191 | 0.091365601 |
| 0.14727468  | 0.069464185 | 0.021014318 | 0.136340831 | 0.071181379 |
| 0.40778092  | 0.049162225 | 0.038254324 | 0.216603166 | 0.050191842 |
| 0.500092953 | 0.036405292 | 0.034032857 | 0.255161862 | 0.046042434 |

Table S2. RPPA Protein expression data of 15 Primary Tumors

Brown et al.

| Raptor-R-V  | Rb_pS807_S811-R-V | RBM15-R-V   | Rictor-R-C  | Rictor_pT1135-R-V |
|-------------|-------------------|-------------|-------------|-------------------|
| 0.76617323  | 0.173554221       | 0.111238239 | 0.109094645 | 0.355884424       |
| 0.512437765 | 0.369946873       | 0.184947812 | 0.19084115  | 0.377171328       |
| 0.924471929 | 0.553655677       | 0.147332208 | 0.21094723  | 0.398021403       |
| 0.559412034 | 0.22422575        | 0.184499146 | 0.130584366 | 0.411478554       |
| 0.701628631 | 0.175739915       | 0.105585585 | 0.133811983 | 0.449967003       |
| 0.444674368 | 0.439685341       | 0.100450597 | 0.101608063 | 0.325362094       |
| 0.713786914 | 0.164577411       | 0.105285647 | 0.108545342 | 0.379135329       |
| 0.562605641 | 0.321740516       | 0.094801008 | 0.152198995 | 0.380714731       |
| 0.435612029 | 0.146508899       | 0.126190204 | 0.130211239 | 0.444891082       |
| 0.628487404 | 0.18768096        | 0.092175035 | 0.103258775 | 0.47947001        |
| 1.023479641 | 0.616400615       | 0.11030694  | 0.352329917 | 0.394996892       |
| 0.82559468  | 0.150677321       | 0.094219592 | 0.11937963  | 0.399232469       |
| 0.446345651 | 0.26680631        | 0.112842949 | 0.127476772 | 0.424649426       |
| 0.871621787 | 0.567960754       | 0.129545775 | 0.209161395 | 0.388144866       |
| 1.242920778 | 0.65779699        | 0.232981886 | 0.230705492 | 0.33229733        |

Table S2. RPPA Protein expression data of 15 Primary Tumors

Brown et al.

| S6_pS235_S236-R-V | S6_pS240_S244-R-V | SCD1-M-V    | SDHA-M-V    | SF2-M-V     |
|-------------------|-------------------|-------------|-------------|-------------|
| 0.037766417       | 0.030911527       | 0.085101935 | 0.505217648 | 0.201571984 |
| 0.081846394       | 0.078871788       | 0.063389164 | 0.79557037  | 0.166473671 |
| 0.032419902       | 0.025274419       | 0.081967871 | 0.574680568 | 0.181877829 |
| 0.032919371       | 0.024914291       | 0.081833401 | 0.227273451 | 0.205444938 |
| 0.04672561        | 0.045027426       | 0.059667827 | 0.917094652 | 0.139282946 |
| 0.040098882       | 0.038641538       | 0.057178276 | 0.580780618 | 0.121126989 |
| 0.035428855       | 0.031034989       | 0.071835819 | 0.541795496 | 0.187409661 |
| 0.110206184       | 0.091426416       | 0.068071791 | 0.723140804 | 0.246561779 |
| 0.055843933       | 0.053814354       | 0.079649949 | 0.665542917 | 0.124879674 |
| 0.044784163       | 0.039894303       | 0.075566604 | 0.828673359 | 0.206943389 |
| 0.041889546       | 0.037223409       | 0.07961911  | 0.635106223 | 0.176861977 |
| 0.02935406        | 0.028287223       | 0.070172252 | 0.787132062 | 0.146551994 |
| 0.040650227       | 0.039172845       | 0.057200971 | 0.697385186 | 0.128556062 |
| 0.031518346       | 0.027436841       | 0.085074186 | 0.598054013 | 0.190313371 |
| 0.040535335       | 0.034133848       | 0.079113763 | 0.570801721 | 0.22272353  |

Table S2. RPPA Protein expression data of 15 Primary Tumors

Brown et al.

| Shc_pY317-R-V | Smad1-R-V   | Smad3-R-V   | Smad4-M-V   | Src-M-V     |
|---------------|-------------|-------------|-------------|-------------|
| 0.066516708   | 0.312908807 | 0.383515473 | 0.18717999  | 0.425478945 |
| 0.046457937   | 0.113357758 | 0.663259197 | 0.106501012 | 0.326845249 |
| 0.087497698   | 0.303286027 | 0.567391266 | 0.172365695 | 0.491439654 |
| 0.063160636   | 0.396057935 | 0.511558555 | 0.162567165 | 0.648386533 |
| 0.070178732   | 0.233711936 | 0.552810702 | 0.168417704 | 0.388216262 |
| 0.065764574   | 0.256727668 | 0.471543732 | 0.182469913 | 0.3454925   |
| 0.070432435   | 0.307631178 | 0.40688822  | 0.186899183 | 0.462805357 |
| 0.065580696   | 0.266988618 | 0.413695354 | 0.173763399 | 0.349268959 |
| 0.086611418   | 0.212054532 | 0.60467194  | 0.144873652 | 0.738319934 |
| 0.069374694   | 0.244661719 | 0.53475793  | 0.185169081 | 0.392033475 |
| 0.050449277   | 0.281305468 | 0.392117986 | 0.188508051 | 0.700413082 |
| 0.05491864    | 0.296996392 | 0.411337049 | 0.169585926 | 0.575782021 |
| 0.035832406   | 0.197178201 | 0.397552382 | 0.203830601 | 0.544001416 |
| 0.084967693   | 0.313400506 | 0.46526297  | 0.189494345 | 0.742119612 |
| 0.047362037   | 0.280081228 | 0.920901847 | 0.223795117 | 0.502365954 |

Table S2. RPPA Protein expression data of 15 Primary Tumors

Brown et al.

| Src_pY416-R-C | Src_pY527-R-V | STAT3_pY705-R-V | STAT5-alpha-R-V | Stathmin-R-V |
|---------------|---------------|-----------------|-----------------|--------------|
| 0.975501746   | 0.410309834   | 0.280589578     | 0.491215316     | 0.388118163  |
| 0.795343877   | 0.552084658   | 0.126757065     | 0.211249724     | 0.673893716  |
| 1.430792687   | 0.806702477   | 0.200664301     | 0.555314562     | 0.425386574  |
| 0.171646162   | 0.4624522     | 0.116521184     | 0.400026005     | 0.445529962  |
| 0.622687089   | 0.405731065   | 0.215970286     | 0.26232959      | 0.49350542   |
| 5.749874927   | 1.469127179   | 0.349244913     | 0.283695058     | 0.394237993  |
| 0.930469992   | 0.424289744   | 0.273556923     | 0.474698314     | 0.38330946   |
| 0.912515585   | 0.426332776   | 0.205506877     | 0.32847439      | 0.400139828  |
| 0.444294615   | 0.571828993   | 0.12454582      | 0.144136043     | 0.694532469  |
| 0.367290938   | 0.505976188   | 0.135223397     | 0.245497119     | 0.572508626  |
| 2.230004771   | 1.254360911   | 0.244172029     | 0.437624844     | 0.435796548  |
| 0.794820799   | 0.238386994   | 0.200877329     | 0.596831777     | 0.532567957  |
| 0.836910591   | 0.825656859   | 0.229569599     | 0.644066042     | 0.559598686  |
| 1.457139546   | 0.777182794   | 0.197083904     | 0.585432603     | 0.460987211  |
| 0.159818317   | 0.201025531   | 0.135851767     | 0.590192643     | 0.448947683  |



Table S2. RPPA Protein expression data of 15 Primary Tumors

Brown et al.

| Syk-M-V     | TAZ-R-V     | TFRC-R-V    | TIGAR-R-V   | Transglutaminase-M-V |
|-------------|-------------|-------------|-------------|----------------------|
| 0.530110024 | 0.390951596 | 1.599052301 | 0.770809512 | 0.321047235          |
| 0.151392377 | 0.417420579 | 1.770985437 | 0.52119665  | 0.221697041          |
| 0.925820679 | 0.345135367 | 0.498697054 | 1.377729776 | 0.281278846          |
| 0.999501617 | 0.665202471 | 0.335238783 | 1.060466242 | 0.366189622          |
| 0.323215838 | 0.450547955 | 0.6152999   | 0.624604095 | 0.257034393          |
| 0.39046943  | 0.458849345 | 0.982456725 | 0.841367491 | 0.209978163          |
| 0.508219799 | 0.433801888 | 1.478277937 | 0.792110888 | 0.338137636          |
| 0.256696319 | 0.570946233 | 0.898033134 | 0.501088398 | 0.270724463          |
| 0.194800913 | 0.708073285 | 0.365498044 | 0.636268686 | 0.322042369          |
| 0.811067668 | 0.563137238 | 0.297548137 | 0.599175204 | 0.313916367          |
| 0.730417621 | 0.330623773 | 0.686612177 | 0.565208815 | 0.265637296          |
| 0.824084559 | 0.37567257  | 0.320829097 | 0.624749718 | 0.280519307          |
| 0.611036448 | 0.390604106 | 0.624111306 | 0.547783745 | 0.23199209           |
| 1.061530539 | 0.38095275  | 0.329214225 | 0.865752205 | 0.276591609          |
| 0.332734491 | 0.305858062 | 0.863759172 | 0.82354134  | 0.275798654          |

Table S2. RPPA Protein expression data of 15 Primary Tumors

Brown et al.

| TSC1-R-C    | TTF1-R-V    | Tuberin-R-V | Tuberin_pT1462-R-V | TYRO3-R-V   |
|-------------|-------------|-------------|--------------------|-------------|
| 0.779295912 | 0.248235498 | 0.485760489 | 0.11692171         | 0.523795322 |
| 0.24489593  | 0.222711529 | 0.230874547 | 0.108315641        | 0.244004318 |
| 1.206911117 | 0.249480869 | 1.806909855 | 0.235556554        | 0.440980838 |
| 1.192407064 | 0.250243299 | 0.447612712 | 0.086284665        | 0.154450951 |
| 0.584760334 | 0.26098939  | 0.533546837 | 0.089728621        | 0.416528495 |
| 0.454202823 | 0.189497763 | 0.210345806 | 0.069738587        | 0.778426249 |
| 0.714783445 | 0.297243072 | 0.455385492 | 0.114337725        | 0.495748656 |
| 0.652191559 | 0.220083443 | 0.520441437 | 0.102660242        | 0.269833559 |
| 0.39674238  | 0.220166319 | 0.202213936 | 0.086492921        | 0.256403264 |
| 0.498030675 | 0.230410516 | 0.447997008 | 0.108565086        | 0.506628439 |
| 1.097060197 | 0.260798208 | 1.881702068 | 0.307954056        | 0.255148979 |
| 0.962928896 | 0.23203375  | 0.643331844 | 0.129655312        | 0.442784608 |
| 0.471539299 | 0.298418564 | 0.45885071  | 0.100308502        | 0.154152855 |
| 1.224682281 | 0.207173662 | 1.83674129  | 0.2340462          | 0.451664374 |
| 1.466536828 | 0.224586491 | 1.857464459 | 0.209802855        | 0.727504847 |

Table S2. RPPA Protein expression data of 15 Primary Tumors

Brown et al.

| UBAC1-R-V   | UGT1A-M-V   | UQCRC2-M-C  | VEGFR2-R-V  | XRCC1-R-E   |
|-------------|-------------|-------------|-------------|-------------|
| 0.153987855 | 0.165070859 | 0.137579873 | 0.62663534  | 0.132713497 |
| 0.227088057 | 0.239784583 | 0.19420257  | 0.542125016 | 0.112482218 |
| 0.118210149 | 0.158182194 | 0.111226877 | 0.547911661 | 0.118382093 |
| 0.252162279 | 0.155001403 | 0.110377885 | 0.695165934 | 0.113283012 |
| 0.165405116 | 0.212007057 | 0.208974742 | 0.597531893 | 0.130779978 |
| 0.110175553 | 0.132076072 | 0.113661846 | 0.690182358 | 0.071764944 |
| 0.160751891 | 0.171419676 | 0.143348329 | 0.661964001 | 0.136892186 |
| 0.611403102 | 0.162908353 | 0.118180177 | 0.546442798 | 0.093336276 |
| 0.271644737 | 0.176746733 | 0.098884286 | 0.368687584 | 0.081856439 |
| 0.20084372  | 0.18594674  | 0.141246826 | 0.529235512 | 0.097825844 |
| 0.174787026 | 0.14277903  | 0.103231582 | 0.529754602 | 0.116078233 |
| 0.143096891 | 0.142383794 | 0.135339687 | 0.632502823 | 0.107186636 |
| 0.192535484 | 0.157835024 | 0.122220211 | 0.705307907 | 0.089138088 |
| 0.136810358 | 0.18285187  | 0.115033131 | 0.519536599 | 0.117092683 |
| 0.31833362  | 0.124489252 | 0.102641311 | 0.600794977 | 0.157537936 |

Table S2. RPPA Protein expression data of 15 Primary Tumors

Brown et al.

| YAP-R-E     | YAP_pS127-R-E | YB-1-R-V    | YB-1_pS102-R-V |
|-------------|---------------|-------------|----------------|
| 0.208517665 | 0.326144118   | 0.100285795 | 0.339782594    |
| 0.403974765 | 1.437447435   | 0.181530488 | 0.419649978    |
| 0.179640592 | 0.382554806   | 0.098631347 | 0.339485772    |
| 0.297937137 | 0.891438526   | 0.104802225 | 0.514831392    |
| 0.213993718 | 0.315774837   | 0.071982801 | 0.419333796    |
| 0.236035896 | 0.822465363   | 0.124405039 | 0.389108809    |
| 0.209723831 | 0.316458422   | 0.096425084 | 0.370499092    |
| 0.269097875 | 0.889605612   | 0.089129829 | 0.443365415    |
| 0.425314873 | 1.557267824   | 0.12612046  | 0.428468477    |
| 0.283394639 | 0.555854537   | 0.095168904 | 0.428617037    |
| 0.145143375 | 0.154127527   | 0.098128361 | 0.310853033    |
| 0.218469413 | 0.212049795   | 0.098328988 | 0.318794137    |
| 0.223649827 | 0.552153763   | 0.093813244 | 0.336751967    |
| 0.208442493 | 0.458792708   | 0.117968019 | 0.314293135    |
| 0.167897021 | 0.427428747   | 0.111897151 | 0.366343072    |
